# Supplementary material for: PPI Network Analysis of mRNA Expression Profile of Ezrin Knockdown in Esophageal Squamous Cell Carcinoma
Source: Hindawi journal article supplement (doi:10.1155/2014/651954), 2014-01-01
Supplement: f1 [file 651954.f1.pdf]

## Supplementary Material I. Shortest path analysis R script

```
read.table("Ezrin siRNA PPI network.txt")->files
library(igraph)
graph.data.frame(files,directed=F)->PPIN
g1<-"EZR"
g2<-c("ATF3")
shortestpath<-get.all.shortest.paths(PPIN, g1, g2)
for(i in 1:length(shortestpath[[1]])){
print(V(PPIN)[shortestpath[[1]][[i]]])
}
```

**Supplementary Material II.** Differentially expressed genes from the mRNA profile following Ezrin knockdown in ESCC

| Gene symbol              | Official Full Name                                                                     | Fold change |
|--------------------------|----------------------------------------------------------------------------------------|-------------|
| <b>Upregulated genes</b> |                                                                                        |             |
| IFI44                    | interferon-induced protein 44                                                          | 14          |
| C9ORF152                 | chromosome 9 open reading frame 152                                                    | 10          |
| WAPAL                    | wings apart-like homolog (Drosophila)                                                  | 9.8         |
| MGA                      | MAX gene associated                                                                    | 9.4         |
| FEZF2                    | FEZ family zinc finger 2                                                               | 9.2         |
| OASL                     | 2'-5'-oligoadenylate synthetase-like                                                   | 8.4         |
| GTDC1                    | glycosyltransferase-like domain containing 1                                           | 8           |
| ATP13A5                  | ATPase type 13A5                                                                       | 7.8         |
| LOC284561                | uncharacterized LOC284561                                                              | 7.6         |
| AGAP1                    | ArfGAP with GTPase domain, ankyrin repeat and PH domain 1                              | 7.4         |
| MOBKL2B                  | MOB1, Mps One Binder kinase activator-like 2B (yeast)                                  | 7.2         |
| PCCA                     | propionyl Coenzyme A carboxylase, alpha polypeptide                                    | 7.2         |
| DDX58                    | DEAD (Asp-Glu-Ala-Asp) box polypeptide 58                                              | 7           |
| NAPEPLD                  | N-acyl phosphatidylethanolamine phospholipase D                                        | 7           |
| TM4SF4                   | transmembrane 4 L six family member 4                                                  | 7           |
| CARD16                   | caspase recruitment domain family, member 16                                           | 6.8         |
| PLEKHH1                  | pleckstrin homology domain containing, family H (with MyTH4 domain) member 1           | 6.8         |
| CSPG4                    | chondroitin sulfate proteoglycan 4                                                     | 6.4         |
| KIR3DL2                  | killer cell immunoglobulin-like receptor, three domains, long cytoplasmic tail, 2      | 6.4         |
| LOC284408                | hypothetical protein LOC338758                                                         | 6.4         |
| SEMA3F                   | sema domain, immunoglobulin domain (Ig), short basic domain, secreted, (semaphorin) 3F | 6.4         |
| C17ORF77                 | chromosome 17 open reading frame 77                                                    | 6.2         |
| GRIN2C                   | glutamate receptor, ionotropic, N-methyl D-aspartate 2C                                | 6           |
| OTUD1                    | OTU domain containing 1                                                                | 6           |
| ATAD2B                   | ATPase family, AAA domain containing 2B                                                | 5.6         |
| C14ORF182                | chromosome 14 open reading frame 182                                                   | 5.6         |
| STC1                     | stanniocalcin 1                                                                        | 5.6         |
| ASMT                     | acetylserotonin O-methyltransferase                                                    | 5.4         |
| PTGS2                    | prostaglandin-endoperoxide synthase 2 (prostaglandin G/H synthase and cyclooxygenase)  | 5.4         |
| QKI                      | quaking homolog, KH domain RNA binding (mouse)                                         | 5.4         |
| OSTBETA                  | organic solute transporter beta                                                        | 5.2         |
| STK35                    | serine/threonine kinase 35                                                             | 5.2         |
| KCNQ4                    | potassium voltage-gated channel, KQT-like subfamily, member 4                          | 5           |
| TNKS                     | tankyrase, TRF1-interacting ankyrin-related ADP-ribose                                 | 5           |

|          |                                                                      |     |
|----------|----------------------------------------------------------------------|-----|
|          | polymerase                                                           |     |
| C7ORF60  | chromosome 7 open reading frame 60                                   | 4.8 |
| CLEC2B   | C-type lectin domain family 2, member B                              | 4.8 |
| TBC1D3C  | TTBC1 domain family, member 3C                                       | 4.8 |
| TBC1D3F  | TBC1 domain family, member 3F                                        | 4.8 |
| DDX60    | DEAD (Asp-Glu-Ala-Asp) box polypeptide 60                            | 4.6 |
| HSPC047  | HSPC047                                                              | 4.6 |
| C1QBP    | complement component 1, q subcomponent binding protein               | 4.2 |
| FLJ10213 | hypothetical protein FLJ10213                                        | 4.2 |
| ISG15    | ISG15 ubiquitin-like modifier                                        | 4.2 |
| IFIT2    | interferon-induced protein with tetratricopeptide repeats 2          | 4   |
| UBD      | ubiquitin D                                                          | 4   |
| BMP2     | bone morphogenetic protein 2                                         | 3.8 |
| H6PD     | hexose-6-phosphate dehydrogenase (glucose 1-dehydrogenase)           | 3.8 |
| RWDD2A   | RWD domain containing 2A                                             | 3.8 |
| SPINK6   | serine peptidase inhibitor, Kazal type 6                             | 3.8 |
| VWA5B2   | von Willebrand factor A domain containing 5B2                        | 3.8 |
| ZNF93    | zinc finger protein 93                                               | 3.8 |
| PFKFB4   | 6-phosphofructo-2-kinase/fructose-2,6-biphosphatase 4                | 3.6 |
| TRAF3IP3 | TRAF3 interacting protein 3                                          | 3.6 |
| CSNK1D   | casein kinase 1, delta                                               | 3.4 |
| EGLN3    | egl nine homolog 3 (C. elegans)                                      | 3.4 |
| FAM13A   | family with sequence similarity 13, member A                         | 3.4 |
| KCNH5    | potassium voltage-gated channel, subfamily H (eag-related), member 5 | 3.4 |
| POU5F1   | POU class 5 homeobox 1                                               | 3.4 |
| CA9      | carbonic anhydrase IX                                                | 3.2 |
| DHRS3    | dehydrogenase/reductase (SDR family) member 3                        | 3.2 |
| IFIT1    | interferon-induced protein with tetratricopeptide repeats 1          | 3.2 |
| KAL1     | Kallmann syndrome 1 sequence                                         | 3.2 |
| MAP2K6   | mitogen-activated protein kinase kinase 6                            | 3.2 |
| SPAG4    | sperm associated antigen 4                                           | 3.2 |
| C5ORF41  | chromosome 5 open reading frame 41                                   | 3   |
| GPR126   | G protein-coupled receptor 126                                       | 3   |
| IGFBP3   | insulin-like growth factor binding protein 3                         | 3   |
| IL15     | interleukin 15                                                       | 3   |
| LOX      | lysyl oxidase                                                        | 3   |
| MTHFD1   | methylenetetrahydrofolate dehydrogenase (NADP+ dependent)<br>1       | 3   |
| NDRG1    | N-myc downstream regulated 1                                         | 3   |
| NFIL3    | nuclear factor, interleukin 3 regulated                              | 3   |
| PRDM1    | PR domain containing 1, with ZNF domain                              | 3   |
| SLCO1B3  | solute carrier organic anion transporter family, member 1B3          | 3   |
| TMEM45A  | transmembrane protein 45A                                            | 3   |

|           |                                                                                                           |     |
|-----------|-----------------------------------------------------------------------------------------------------------|-----|
| BDKRB2    | bradykinin receptor B2                                                                                    | 2.8 |
| BHLHE40   | basic helix-loop-helix family, member e40                                                                 | 2.8 |
| CNOT2     | CCR4-NOT transcription complex, subunit 2                                                                 | 2.8 |
| CYLD      | cylindromatosis (turban tumor syndrome)                                                                   | 2.8 |
| FOS       | v-fos FBJ murine osteosarcoma viral oncogene homolog                                                      | 2.8 |
| ISG20     | interferon stimulated exonuclease gene 20kDa                                                              | 2.8 |
| MAFF      | v-maf musculoaponeurotic fibrosarcoma oncogene homolog F (avian)                                          | 2.8 |
| NR4A2     | nuclear receptor subfamily 4, group A, member 2                                                           | 2.8 |
| PDK1      | pyruvate dehydrogenase kinase, isozyme 1                                                                  | 2.8 |
| PPFIA4    | protein tyrosine phosphatase, receptor type, f polypeptide (PTPRF), interacting protein (liprin), alpha 4 | 2.8 |
| PROS1     | protein S (alpha)                                                                                         | 2.8 |
| SORBS2    | sorbin and SH3 domain containing 2                                                                        | 2.8 |
| AKAP12    | A kinase (PRKA) anchor protein 12                                                                         | 2.6 |
| ANKZF1    | ankyrin repeat and zinc finger domain containing 1                                                        | 2.6 |
| CTH       | cystathionase (cystathionine gamma-lyase)                                                                 | 2.6 |
| EFNA1     | ephrin-A1                                                                                                 | 2.6 |
| FOSL2     | FOS-like antigen 2                                                                                        | 2.6 |
| FZD10     | frizzled homolog 10 (Drosophila)                                                                          | 2.6 |
| KIAA1539  | KIAA1539                                                                                                  | 2.6 |
| MXI1      | MAX interactor 1                                                                                          | 2.6 |
| NEAT1     | non-protein coding RNA 84                                                                                 | 2.6 |
| PDE4D     | phosphodiesterase 4D                                                                                      | 2.6 |
| PTPRB     | protein tyrosine phosphatase, receptor type, B                                                            | 2.6 |
| SNED1     | sushi, nidogen and EGF-like domains 1                                                                     | 2.6 |
| STC2      | stanniocalcin 2                                                                                           | 2.6 |
| TBX3      | T-box 3                                                                                                   | 2.6 |
| ABCA5     | ATP-binding cassette, sub-family A (ABC1), member 5                                                       | 2.4 |
| AK3L1     | adenylate kinase 3-like 2; adenylate kinase 3-like 1                                                      | 2.4 |
| BNIP3     | BCL2/adenovirus E1B 19kDa interacting protein 3                                                           | 2.4 |
| BNIP3L    | BCL2/adenovirus E1B 19kDa interacting protein 3-like                                                      | 2.4 |
| C4ORF3    | chromosome 4 open reading frame 3                                                                         | 2.4 |
| CA12      | carbonic anhydrase XII                                                                                    | 2.4 |
| CEBPZ     | CCAAT/enhancer binding protein (C/EBP), zeta                                                              | 2.4 |
| CHST2     | carbohydrate (N-acetylglucosamine-6-O) sulfotransferase 2                                                 | 2.4 |
| DEPDC6    | DEP domain containing 6                                                                                   | 2.4 |
| ENO2      | enolase 2 (gamma, neuronal)                                                                               | 2.4 |
| FLCN      | folliculin                                                                                                | 2.4 |
| HK2       | hexokinase 2 pseudogene; hexokinase 2                                                                     | 2.4 |
| IL20RB    | interleukin 20 receptor beta                                                                              | 2.4 |
| KLF9      | Kruppel-like factor 9                                                                                     | 2.4 |
| LOC338758 | hypothetisches Protein LOC338758                                                                          | 2.4 |
| LOXL2     | lysyl oxidase-like 2                                                                                      | 2.4 |

|           |                                                                                             |     |
|-----------|---------------------------------------------------------------------------------------------|-----|
| NID2      | nidogen 2 (osteonidogen)                                                                    | 2.4 |
| PAPPA2    | pappalysin 2                                                                                | 2.4 |
| PDE1A     | phosphodiesterase 1A, calmodulin-dependent                                                  | 2.4 |
| PLOD2     | procollagen-lysine, 2-oxoglutarate 5-dioxygenase 2                                          | 2.4 |
| PPP1R3B   | protein phosphatase 1, regulatory (inhibitor) subunit 3B                                    | 2.4 |
| QSOX1     | quiescin Q6 sulfhydryl oxidase 1                                                            | 2.4 |
| SLC6A6    | solute carrier family 6 (neurotransmitter transporter, taurine), member 6                   | 2.4 |
| SPINK1    | serine peptidase inhibitor, Kazal type 1                                                    | 2.4 |
| TMEM27    | transmembrane protein 27                                                                    | 2.4 |
| TNFAIP3   | tumor necrosis factor, alpha-induced protein 3                                              | 2.4 |
| UBE2O     | ubiquitin-conjugating enzyme E2O                                                            | 2.4 |
| WIPI1     | WD repeat domain, phosphoinositide interacting 1                                            | 2.4 |
| ZNF292    | zinc finger protein 292                                                                     | 2.4 |
| ZNF395    | zinc finger protein 395                                                                     | 2.4 |
| ATF3      | activating transcription factor 3                                                           | 2.2 |
| ATP1B3    | ATPase, Na <sup>+</sup> /K <sup>+</sup> transporting, beta 3 polypeptide                    | 2.2 |
| CASP9     | caspase 9, apoptosis-related cysteine peptidase                                             | 2.2 |
| CDKN1A    | cyclin-dependent kinase inhibitor 1A (p21, Cip1)                                            | 2.2 |
| DNER      | delta/notch-like EGF repeat containing                                                      | 2.2 |
| FOXP3     | forkhead box N3                                                                             | 2.2 |
| FUT11     | fucosyltransferase 11 (alpha (1,3) fucosyltransferase)                                      | 2.2 |
| GDF15     | growth differentiation factor 15                                                            | 2.2 |
| HIST1H2BC | histone cluster 1, H2bc                                                                     | 2.2 |
| IER3      | immediate early response 3                                                                  | 2.2 |
| IGFBP1    | insulin-like growth factor binding protein 1                                                | 2.2 |
| INSIG2    | insulin induced gene 2                                                                      | 2.2 |
| IQSEC2    | IQ motif and Sec7 domain 2                                                                  | 2.2 |
| ITGA5     | integrin, alpha 5 (fibronectin receptor, alpha polypeptide)                                 | 2.2 |
| ITM2C     | integral membrane protein 2C                                                                | 2.2 |
| KDM3A     | lysine (K)-specific demethylase 3A                                                          | 2.2 |
| KRT17     | keratin 17; keratin 17 pseudogene 3                                                         | 2.2 |
| LOC285831 | hypothetical protein LOC285831                                                              | 2.2 |
| PDK4      | pyruvate dehydrogenase kinase, isozyme 4                                                    | 2.2 |
| PLEKHG1   | pleckstrin homology domain containing, family G (with RhoGef domain) member 1               | 2.2 |
| RCBTB2    | regulator of chromosome condensation (RCC1) and BTB (POZ) domain containing protein 2       | 2.2 |
| SLC2A13   | solute carrier family 2 (facilitated glucose transporter), member 13                        | 2.2 |
| SLC7A11   | solute carrier family 7, (cationic amino acid transporter, y <sup>+</sup> system) member 11 | 2.2 |
| SMOX      | spermine oxidase                                                                            | 2.2 |
| TMIE      | transmembrane inner ear                                                                     | 2.2 |

|            |                                                                                                                       |     |
|------------|-----------------------------------------------------------------------------------------------------------------------|-----|
| WSB1       | WD repeat and SOCS box-containing 1                                                                                   | 2.2 |
| ZDHHC11    | zinc finger, DHHC-type containing 11                                                                                  | 2.2 |
| ZNF652     | zinc finger protein 652                                                                                               | 2.2 |
| AFF1       | AF4/FMR2 family, member 1                                                                                             | 2   |
| ALDOC      | aldolase C, fructose-bisphosphate                                                                                     | 2   |
| ANK3       | ankyrin 3, node of Ranvier (ankyrin G)                                                                                | 2   |
| ANKRD37    | ankyrin repeat domain 37                                                                                              | 2   |
| C11ORF86   | chromosome 11 open reading frame 86                                                                                   | 2   |
| C22ORF31   | chromosome 22 open reading frame 31                                                                                   | 2   |
| CCNB2      | cyclin B2                                                                                                             | 2   |
| CD83       | CD83 molecule                                                                                                         | 2   |
| EFNA3      | ephrin-A3                                                                                                             | 2   |
| ERO1L      | ERO1-like ( <i>S. cerevisiae</i> )                                                                                    | 2   |
| FAM117B    | family with sequence similarity 117, member B                                                                         | 2   |
| GBE1       | glucan (1,4-alpha-), branching enzyme 1                                                                               | 2   |
| HILPDA     | histone cluster 1, H2ac                                                                                               | 2   |
| HIST1H2AC  | histone cluster 1, H2ac                                                                                               | 2   |
| HIST1H2AG  | histone cluster 1, H2ag                                                                                               | 2   |
| HIST2H2AA3 | histone cluster 2, H2aa3; histone cluster 2, H2aa4                                                                    | 2   |
| IFIT3      | interferon-induced protein with tetratricopeptide repeats 3                                                           | 2   |
| ITGAV      | integrin, alpha V (vitronectin receptor, alpha polypeptide, antigen CD51)                                             | 2   |
| KYNU       | kynureninase (L-kynurenine hydrolase)                                                                                 | 2   |
| MAP3K2     | mitogen-activated protein kinase kinase kinase 2                                                                      | 2   |
| NAPB       | N-ethylmaleimide-sensitive factor attachment protein, beta                                                            | 2   |
| NOTCH3     | Notch homolog 3 ( <i>Drosophila</i> )                                                                                 | 2   |
| PABPC4L    | poly(A) binding protein, cytoplasmic 4-like                                                                           | 2   |
| PDGFA      | platelet-derived growth factor alpha polypeptide                                                                      | 2   |
| PGK1       | phosphoglycerate kinase 1                                                                                             | 2   |
| PHF21A     | PHD finger protein 21A                                                                                                | 2   |
| PPARGC1A   | peroxisome proliferator-activated receptor gamma, coactivator 1 alpha                                                 | 2   |
| RASSF9     | Ras association (RalGDS/AF-6) domain family (N-terminal) member 9                                                     | 2   |
| SLC16A6    | solute carrier family 16, member 6 (monocarboxylic acid transporter 7); similar to solute carrier family 16, member 6 | 2   |
| SLC17A5    | solute carrier family 17 (anion/sugar transporter), member 5                                                          | 2   |
| SLC7A1     | solute carrier family 7 (cationic amino acid transporter, y+ system), member 1                                        | 2   |
| SMOC1      | SPARC related modular calcium binding 1                                                                               | 2   |
| SNX14      | sorting nexin 14                                                                                                      | 2   |
| SREBF1     | sterol regulatory element binding transcription factor 1                                                              | 2   |
| SYT12      | synaptotagmin XII                                                                                                     | 2   |
| TANC2      | tetratricopeptide repeat, ankyrin repeat and coiled-coil                                                              | 2   |

|                            |                                                                                               |  |      |
|----------------------------|-----------------------------------------------------------------------------------------------|--|------|
|                            | containing 2                                                                                  |  |      |
| TGM2                       | transglutaminase 2 (C polypeptide, protein-glutamine-gamma-glutamyltransferase)               |  | 2    |
| TMEM47                     | transmembrane protein 47                                                                      |  | 2    |
| USP37                      | ubiquitin specific peptidase 37                                                               |  | 2    |
| ZNF48                      | zinc finger protein 48                                                                        |  | 2    |
| <b>Downregulated genes</b> |                                                                                               |  |      |
| ABCA13                     | ATP-binding cassette, sub-family A (ABC1), member 13                                          |  | -2   |
| C14ORF126                  | chromosome 14 open reading frame 126                                                          |  | -2   |
| CYR61                      | cysteine-rich, angiogenic inducer, 61                                                         |  | -2   |
| DHDPSL                     | N-acetylneuraminase pyruvate lyase 2 (putative)                                               |  | -2   |
| GPR56                      | G protein-coupled receptor 56                                                                 |  | -2   |
| KLHDC7A                    | kelch domain containing 7A                                                                    |  | -2   |
| LOC133926                  | hypothetical protein LOC133926                                                                |  | -2   |
| NRG1                       | neuregulin 1                                                                                  |  | -2   |
| KITLG                      | KIT ligand                                                                                    |  | -2.2 |
| CXORF48                    | similar to chromosome X open reading frame 48; chromosome X open reading frame 48             |  | -2.4 |
| MDFIC                      | MyoD family inhibitor domain containing                                                       |  | -2.4 |
| MPP7                       | membrane protein, palmitoylated 7 (MAGUK p55 subfamily member 7)                              |  | -2.4 |
| EDIL3                      | EGF-like repeats and discoidin I-like domains 3                                               |  | -2.6 |
| PPP3CA                     | protein phosphatase 3 (formerly 2B), catalytic subunit, alpha isoform                         |  | -2.6 |
| SDC2                       | syndecan 2                                                                                    |  | -2.6 |
| CYB561                     | cytochrome b-561                                                                              |  | -2.8 |
| OLFML2B                    | olfactomedin-like 2B                                                                          |  | -2.8 |
| MUC12                      | mucin 12, cell surface associated; similar to mucin 11                                        |  | -3   |
| OLFML1                     | olfactomedin-like 1                                                                           |  | -3   |
| MT1E                       | metallothionein 1E                                                                            |  | -3.2 |
| CTGF                       | connective tissue growth factor                                                               |  | -3.6 |
| TAGLN                      | transgelin                                                                                    |  | -3.6 |
| ALG10                      | asparagine-linked glycosylation 10, alpha-1,2-glucosyltransferase homolog ( <i>S. pombe</i> ) |  | -4   |
| ANXA9                      | annexin A9                                                                                    |  | -4   |
| SPRED1                     | sprouty-related, EVH1 domain containing 1                                                     |  | -4.2 |
| DCN                        | decorin                                                                                       |  | -4.4 |
| PAGE1                      | P antigen family, member 1 (prostate associated)                                              |  | -5.2 |
| FAM179A                    | family with sequence similarity 179, member A                                                 |  | -5.4 |
| HEATR7B2                   | HEAT repeat family member 7B2                                                                 |  | -5.4 |
| ZNF277                     | zinc finger protein 277                                                                       |  | -5.4 |
| ZNF610                     | zinc finger protein 610                                                                       |  | -5.4 |
| PLXNA2                     | plexin A2                                                                                     |  | -5.6 |
| CPS1                       | carbamoyl-phosphate synthetase 1, mitochondrial                                               |  | -6.2 |

|            |                                                        |      |
|------------|--------------------------------------------------------|------|
| VDAC3      | voltage-dependent anion channel 3                      | -6.2 |
| KRT4       | keratin 4                                              | -6.4 |
| MUC12      | mucin 12, cell surface associated; similar to mucin 11 | -6.4 |
| DPY19L2    | dpy-19-like 2 (C. elegans)                             | -6.6 |
| ARL4D      | ADP-ribosylation factor-like 4D                        | -7   |
| KIAA0226   | KIAA0226                                               | -7   |
| CLGN       | calmegin                                               | -7.6 |
| HSPA9      | heat shock 70kDa protein 9 (mortalin)                  | -7.6 |
| NCRNA00032 | non-protein coding RNA 32                              | -8.4 |
| C6ORF162   | chromosome 6 open reading frame 162                    | -8.6 |
| A2BP1      | ataxin 2-binding protein 1                             | -9   |
| SGOL1      | shugoshin-like 1 (S. pombe)                            | -11  |

---



### Supplementary Material III. Ezrin siRNA PPI network

ADAM19 pp A2M  
HSPA5 pp A2M  
KLK3 pp A2M  
LRP1 pp A2M  
MMP2 pp A2M  
PDGFA pp A2M  
ABL1 pp ABL1  
BCAR1 pp ABL1  
CDK1 pp ABL1  
EPHB2 pp ABL1  
KIT pp ABL1  
PRKDC pp ABL1  
TP53 pp ABL1  
BDKRB2pp ACE  
NDRG1 pp ACSL3  
ABL1 pp ACTA1  
ACTA1 pp ACTA1  
CLIC5 pp ACTA1  
DLG1 pp ACTA1  
EGFR pp ACTA1  
HCLS1 pp ACTA1  
PRKCA pp ACTA1  
PRKCD pp ACTA1  
PRKCE pp ACTA1  
RAC1 pp ACTA1  
TAGLN pp ACTA1  
TMSB4Xpp ACTA1  
TP53 pp ACTA1  
ACTB pp ACTB  
ACTG1 pp ACTB  
EZRpp ACTB  
GAPDH pp ACTB  
HSD17B4 pp ACTB  
LMNA pp ACTB  
LYNpp ACTB  
PLD2 pp ACTB  
PRKCD pp ACTB  
PTNpp ACTB  
RAC1 pp ACTB  
SMAD3 pp ACTB  
TGM2 pp ACTB  
TMSB4Xpp ACTB  
ACTB pp ACTC1

EZR pp ACTC1  
PRKCE pp ACTC1  
ACTG1 pp ACTG1  
NDRG1 pp ACTG1  
SUMO4 pp ACTG1  
TMSB4X pp ACTG1  
BMP2 pp ACVR1  
ENG pp ACVR1  
SMAD9 pp ACVR1  
BMP2 pp ACVR2B  
EPHA3 pp ADAM10  
FURIN pp ADAM19  
CLGN pp ADAM2  
AP2M1 pp ADRA1B  
EZR pp ADRA1B  
GNA11 pp ADRA1B  
NOS1 pp ADRA1B  
PRKCA pp ADRA1B  
STAT1 pp ADRA1B  
AKAP12 pp ADRB2  
AKAP5 pp ADRB2  
ARRB2 pp ADRB2  
GNA11 pp ADRB2  
GRK5 pp ADRB2  
GRK6 pp ADRB2  
NOS1 pp ADRB2  
PRKCD pp ADRB2  
SLC9A3R1 pp ADRB2  
SLC9A3R2 pp ADRB2  
AGTR1 pp ADRBK1  
AKAP12 pp ADRBK1  
CAPN2 pp ADRBK1  
CAV1 pp ADRBK1  
EGFR pp ADRBK1  
GIT1 pp ADRBK1  
MAPK3 pp ADRBK1  
PRKACA pp ADRBK1  
PRKCA pp ADRBK1  
PRKCB pp ADRBK1  
PRKCD pp ADRBK1  
PRKCG pp ADRBK1  
AGTR1 pp ADRBK2  
GIT1 pp ADRBK2  
PRDM1 pp AES

MLLT1 pp AFF1  
PPFIA4 pp AGTPBP1  
ARRB2 pp AGTR1  
BDKRB2pp AGTR1  
NOS3 pp AGTR1  
RAB5A pp AGTR1  
STC2 pp AIFM1  
GABRB1pp AKAP5  
FNBP1 pp AKAP9  
PKN1 pp AKAP9  
PPP1CA pp AKAP9  
AKT1 pp AKT1  
BCL10 pp AKT1  
CASP3 pp AKT1  
ILK pp AKT1  
PKN2 pp AKT1  
PPP2CA pp AKT1  
PRKCZ pp AKT1  
RPS6KB1 pp AKT1  
TSC1 pp AKT1  
VEGFA pp AKT1  
ALDOA pp ALDOA  
PLD2 pp ALDOA  
SUMO4 pp ALDOA  
TGM2 pp ALDOA  
TUBB pp ALDOA  
PLD2 pp ALDOC  
ANGPT1 pp ANGPT1  
KCNC1 pp ANK3  
SCN2A pp ANK3  
SCNN1B pp ANK3  
SMAD2 pp ANK3  
SMAD3 pp ANK3  
SPTBN4 pp ANK3  
TGM2 pp ANXA1  
AP1G1 pp AP1G1  
AP1M2 pp AP1G1  
NDRG1 pp AP1M2  
AP2M1 pp AP2M1  
ARRB2 pp AP2M1  
NDRG1 pp AP2M1  
CTGF pp AP3D1  
CASP9 pp APAF1  
FAS pp APAF1

HIP1 pp APAF1  
PPP1CA pp APAF1  
APOA1 pp APOA1  
AES pp AR  
AKT1 pp AR  
AR pp AR  
ATF2 pp AR  
CALM1 pp AR  
CAV1 pp AR  
CDK1 pp AR  
CREBBP pp AR  
EGFR pp AR  
HDAC1 pp AR  
HIF1A pp AR  
KAT5 pp AR  
MAPK1 pp AR  
MED1 pp AR  
MYBBP1A pp AR  
NCOA1 pp AR  
NISCH pp AR  
NR0B1 pp AR  
PIAS4 pp AR  
POU5F1 pp AR  
RUNX1 pp AR  
SMAD3 pp AR  
SMAD4 pp AR  
SP1 pp AR  
SUMO1 pp AR  
TSG101 pp AR  
UBE2I pp AR  
ARAF pp ARAF  
MAP2K2 pp ARAF  
YWHAG pp ARAF  
AP3D1 pp ARF6  
RHOA pp ARHGAP5  
CASP3 pp ARHGDIB  
ANXA9 pp ARHGEF10L  
SCN2A pp ARHGEF10L  
TLE1 pp ARL4D  
ARF6 pp ARRB2  
CLTC pp ARRB2  
CSNK2A1 pp ARRB2  
CSNK2A2 pp ARRB2  
FLNA pp ARRB2

MAP3K5 pp ARRB2  
MAPK1 pp ARRB2  
RAF1 pp ARRB2  
TGFBR3 pp ARRB2  
ASCL1 pp ASCL1  
BMP2 pp ASCL1  
UBQLN1 pp ASCL1  
ATF2 pp ATF2  
CEBPG pp ATF2  
FOS pp ATF2  
GTF2F2 pp ATF2  
JUN pp ATF2  
MAPK13 pp ATF2  
MAPK14 pp ATF2  
MAPK8 pp ATF2  
RB1 pp ATF2  
RUVBL2 pp ATF2  
SMAD3 pp ATF2  
SMAD4 pp ATF2  
UBE2I pp ATF2  
ATF3 pp ATF3  
BATF3 pp ATF3  
ATF2 pp ATF7  
A2M pp ATF7IP  
ACTB pp ATF7IP  
ACTG1 pp ATF7IP  
CSPG4 pp ATF7IP  
FLT4 pp ATF7IP  
GMEB1 pp ATF7IP  
HSPG2 pp ATF7IP  
LAMC1 pp ATF7IP  
PAPPA2 pp ATF7IP  
POLR2C pp ATF7IP  
EGFR pp ATP1A1  
MAPK3 pp ATP1A1  
NDRG1 pp ATP1A1  
CASK pp ATP2B4  
DLG1 pp ATP2B4  
DLG3 pp ATP2B4  
DLG4 pp ATP2B4  
NOS1 pp ATP2B4  
AKT1 pp ATXN1  
ATXN1 pp ATXN1  
CDK6 pp ATXN1

PRDM1 pp ATXN1  
PSMC3 pp ATXN1  
PTGDS pp ATXN1  
UBQLN4pp ATXN1  
YWHAE pp ATXN1  
AZGP1 pp AZGP1  
SLC7A11 pp BAAT  
CSNK1Dpp BACE1  
FURIN pp BACE1  
ITM2C pp BACE1  
AKT1 pp BAD  
EWSR1 pp BAD  
HRK pp BAD  
MAPK8 pp BAD  
MCL1 pp BAD  
PIM1 pp BAD  
PPP1CA pp BAD  
PPP3CA pp BAD  
PRKACA pp BAD  
RAF1 pp BAD  
RPS6KA1 pp BAD  
YWHAE pp BAD  
ATXN1 pp BAT2  
C1QBP pp BAT2  
EIF3E pp BAT2  
PSMA3 pp BAT2  
UBAP2L pp BAT2  
BATF pp BATF  
DDIT3 pp BATF  
PGRpp BATF3  
CASP3 pp BCAR1  
ESR1 pp BCAR1  
HSPA5 pp BCAR1  
PTK2 pp BCAR1  
TUBA4App BCAR1  
YWHAZ pp BCAR1  
PTNpp BCCIP  
BCL10 pp BCL10  
MAP3K7pp BCL10  
BAD pp BCL2  
BCL2 pp BCL2  
BCL2L1 pp BCL2  
BNIP3 pp BCL2  
BNIP3L pp BCL2

CASP3 pp BCL2  
FKBP8 pp BCL2  
HRK pp BCL2  
MAPK1 pp BCL2  
MAPK8 pp BCL2  
NLRP1 pp BCL2  
PARP1 pp BCL2  
PPP1CA pp BCL2  
PPP2CA pp BCL2  
PPP2R5A pp BCL2  
PRKCA pp BCL2  
RAF1 pp BCL2  
TP53 pp BCL2  
APAF1 pp BCL2L1  
BAD pp BCL2L1  
BCL2L1 pp BCL2L1  
BNIP3 pp BCL2L1  
BNIP3L pp BCL2L1  
CASP9 pp BCL2L1  
FKBP8 pp BCL2L1  
HRK pp BCL2L1  
MCL1 pp BCL2L1  
NLRP1 pp BCL2L1  
PPP1CA pp BCL2L1  
PSEN2 pp BCL2L1  
COPS5 pp BCL3  
CREBBP pp BCL3  
FOS pp BCL3  
JUN pp BCL3  
KAT5 pp BCL3  
NCOA1 pp BCL3  
NFKB1 pp BCL3  
RXRA pp BCL3  
TBP pp BCL3  
ADRBK1 pp BDKRB2  
ADRBK2 pp BDKRB2  
GNA11 pp BDKRB2  
GRK4 pp BDKRB2  
GRK5 pp BDKRB2  
GRK6 pp BDKRB2  
NOS1 pp BDKRB2  
NOS3 pp BDKRB2  
PRKCD pp BDKRB2  
PTPN11 pp BDKRB2

DIABLO pp BIRC2  
IKBKG pp BIRC2  
TRAF2 pp BIRC2  
CASP9 pp BIRC3  
DIABLO pp BIRC3  
TRAF2 pp BIRC3  
BIRC5 pp BIRC5  
BIRC6 pp BIRC5  
CDK1 pp BIRC5  
DIABLO pp BIRC5  
HSP90AA1 pp BIRC5  
XIAP pp BIRC5  
CASP9 pp BIRC8  
BMP2 pp BMP2  
BMPER pp BMP2  
BMPR1A pp BMP2  
BMPR1Bpp BMP2  
BMPR2 pp BMP2  
CHRDL2pp BMP2  
COL2A1 pp BMP2  
ENG pp BMP2  
GREM2 pp BMP2  
MGP pp BMP2  
NOG pp BMP2  
SOSTDC1 pp BMP2  
TGFB1 pp BMP2  
TGFB2 pp BMP2  
BMPR1A pp BMPR1A  
BMPR1Bpp BMPR1A  
BMPR1Bpp BMPR1B  
TRAF6 pp BMPR1B  
BMPR1A pp BMPR2  
BMPR1Bpp BMPR2  
BMPR2 pp BMPR2  
LIMK1 pp BMPR2  
BNIP3 pp BNIP3  
BNIP3 pp BNIP3L  
BNIP3L pp BNIP3L  
EWSR1 pp BNIP3L  
STEAP3 pp BNIP3L  
QKI pp C10orf10  
CA12 pp C15orf29  
ENO2 pp C16orf45  
PPP3CA pp C16orf74



ATF3 pp C1orf103  
C1orf103 pp C1orf103  
CDC42 pp C1orf103  
FAS pp C1orf103  
HMGB1 pp C1orf103  
MLLT3 pp C1orf103  
MNAT1 pp C1orf103  
POLR2C pp C1orf103  
POLR3F pp C1orf103  
PRMT1 pp C1orf103  
PSMD2 pp C1orf103  
RPLP1 pp C1orf103  
TK1 pp C1orf103  
VIM pp C1orf103  
CDKN1A pp C1orf123  
C1QBP pp C1QA  
CSPG4 pp C1QA  
DCN pp C1QA  
FN1 pp C1QA  
C1QBP pp C1QBP  
EXOSC6 pp C1QBP  
GAB1 pp C1QBP  
GABRB1 pp C1QBP  
HABP4 pp C1QBP  
HRK pp C1QBP  
MAPK3 pp C1QBP  
MMP14 pp C1QBP  
NFYB pp C1QBP  
PRKD1 pp C1QBP  
SFRS9 pp C1QBP  
TOP3B pp C1QBP  
YWHAB pp C1QBP  
YWHAG pp C1QBP  
BMP2 pp C4BPA  
PROS1 pp C4BPA  
ENO2 pp C6orf47  
CDKN1A pp C7orf20  
EEF1G pp C7orf20  
KAT5 pp C7orf20  
ATP5C1 pp CA12  
CA12 pp CA12  
CABIN1 pp CABIN1  
AKAP5 pp CALM1  
CABIN1 pp CALM1

CALM1 pp CALM1  
CCND1 pp CALM1  
CCNE1 pp CALM1  
CSNK2A1 pp CALM1  
CSNK2A2 pp CALM1  
DDX5 pp CALM1  
DLG3 pp CALM1  
EGFR pp CALM1  
ESR1 pp CALM1  
ESR2 pp CALM1  
ESRRG pp CALM1  
EWSR1 pp CALM1  
FAS pp CALM1  
GRK4 pp CALM1  
HSP90AA1 pp CALM1  
KCNQ3 pp CALM1  
NR3C1 pp CALM1  
PDE1A pp CALM1  
PLCD1 pp CALM1  
RELA pp CALM1  
SNCA pp CALM1  
YWHAE pp CALM1  
AR pp CALR  
CALR pp CALR  
F5 pp CALR  
F8 pp CALR  
FBN1 pp CALR  
ITGAV pp CALR  
NR3C1 pp CALR  
PDIA3 pp CALR  
PLP1 pp CALR  
SUMO4 pp CALR  
TF pp CALR  
THBS1 pp CALR  
CFTR pp CANX  
F8 pp CANX  
HLA-A pp CANX  
ITGB1 pp CANX  
MTNR1B pp CANX  
NDRG1 pp CANX  
PDIA3 pp CANX  
PLP1 pp CANX  
TF pp CANX  
CASP9 pp CAPN2

CARD8 pp CARD8  
STC2 pp CARHSP1  
CASK pp CASK  
DLG1 pp CASK  
DLG4 pp CASK  
F11R pp CASK  
CASP10 pp CASP10  
CASP9 pp CASP10  
FADD pp CASP10  
AIFM1 pp CASP3  
APAF1 pp CASP3  
AR pp CASP3  
BIRC2 pp CASP3  
BIRC3 pp CASP3  
BIRC5 pp CASP3  
BIRC6 pp CASP3  
BIRC7 pp CASP3  
CASP10 pp CASP3  
CASP3 pp CASP3  
CASP9 pp CASP3  
DCTN1 pp CASP3  
GZMB pp CASP3  
HCLS1 pp CASP3  
HIP1 pp CASP3  
MET pp CASP3  
ABL1 pp CASP9  
AKT1 pp CASP9  
BCL10 pp CASP9  
BIRC2 pp CASP9  
BIRC5 pp CASP9  
BIRC6 pp CASP9  
BIRC7 pp CASP9  
CARD8 pp CASP9  
CASP9 pp CASP9  
GMEB1 pp CASP9  
GZMB pp CASP9  
HIP1 pp CASP9  
ILK pp CASP9  
LYNpp CASP9  
MAP2K1pp CASP9  
MAP2K2pp CASP9  
MAPK1 pp CASP9  
MAPK3 pp CASP9  
NLRP1 pp CASP9

NOD1 pp CASP9  
PRKCZ pp CASP9  
SRF pp CASP9  
CASP3 pp CAST  
ABL1 pp CAV1  
CAV1 pp CAV1  
CSNK2A1 pp CAV1  
CSNK2A2 pp CAV1  
EGFR pp CAV1  
IGF1R pp CAV1  
IGFBP3 pp CAV1  
LRP1 pp CAV1  
MAPK1 pp CAV1  
MMP14 pp CAV1  
PLD2 pp CAV1  
RAC1 pp CAV1  
TRAF2 pp CAV1  
CBFA2T3 pp CBFA2T2  
SIN3A pp CBFA2T2  
ZNF652 pp CBFA2T2  
CBFA2T3 pp CBFA2T3  
ZNF652 pp CBFA2T3  
IFIT3 pp CCDC67  
C10orf10 pp CCDC85B  
CCDC67 pp CCDC85B  
CDKN1A pp CCDC85B  
COPS4 pp CCDC85B  
HMG20B pp CCDC85B  
KIAA1539 pp CCDC85B  
KRT17 pp CCDC85B  
KRT6A pp CCDC85B  
MCM10 pp CCDC85B  
PKN1 pp CCDC85B  
SMARCD1 pp CCDC85B  
CCNA1 pp CCNA1  
CDC6 pp CCNA2  
TAF1 pp CCNA2  
TP53 pp CCNA2  
FLNA pp CCNB1  
GADD45B pp CCNB1  
GADD45G pp CCNB1  
KAT5 pp CCNB1  
MAP4 pp CCNB1  
PCNA pp CCNB1

RUNX2 pp CCNB1  
TGFBR2 pp CCNB1  
TSC1 pp CCNB1  
AR pp CCND1  
CDK6 pp CCND1  
GSK3B pp CCND1  
KAT2B pp CCND1  
MCM10 pp CCND1  
NCOA1 pp CCND1  
PCNA pp CCND1  
PRKACA pp CCND1  
RB1 pp CCND1  
RUNX1 pp CCND1  
SP1 pp CCND1  
TAF1 pp CCND1  
THRA pp CCND1  
THRB pp CCND1  
CDKN1A pp CCND2  
RUNX1 pp CCND2  
ATP5C1 pp CCND3  
CDK14 pp CCND3  
CDK6 pp CCND3  
MCM10 pp CCND3  
PCNA pp CCND3  
RUNX1 pp CCND3  
AR pp CCNE1  
CDK2 pp CCNE1  
COIL pp CCNE1  
FBXW7 pp CCNE1  
GSK3B pp CCNE1  
SMARCD3 pp CCNE1  
CDKN1C pp CCNE2  
SUMO2 pp CCNE2  
SUMO3 pp CCNE2  
CD44 pp CD44  
COL14A1 pp CD44  
COL1A1 pp CD44  
COL1A2 pp CD44  
EGFR pp CD44  
ERBB4 pp CD44  
EZR pp CD44  
FGF2 pp CD44  
IGFBP3 pp CD44  
LCK pp CD44

MMP1 pp CD44  
MMP7 pp CD44  
NF2 pp CD44  
SPP1 pp CD44  
TGFB1 pp CD44  
TGFB2 pp CD44  
BNIP3 pp CD47  
UBQLN1 pp CD47  
ADAM2 pp CD9  
KIT pp CD9  
PRKCA pp CD9  
ARHGDIB pp CDC42  
CASP3 pp CDC42  
CSPG4 pp CDC42  
FLNA pp CDC42  
KAT5 pp CDC42  
MAP3K4 pp CDC42  
PAK4 pp CDC42  
PIK3R1 pp CDC42  
PRKCA pp CDC42  
PRKCG pp CDC42  
PRKCZ pp CDC42  
RPS6KB1 pp CDC42  
TBC1D3F pp CDC42  
TNK2 pp CDC42  
MCM10 pp CDC45L  
YWHAG pp CDC5L  
CDK2 pp CDC6  
MCM10 pp CDC6  
CDK2 pp CDC7  
MCM10 pp CDC7  
CA9 pp CDH1  
CASP3 pp CDH1  
CDH1 pp CDH1  
CSNK2A1 pp CDH1  
CTNNA1 pp CDH1  
GSK3B pp CDH1  
HDAC1 pp CDH1  
HDAC2 pp CDH1  
NDRG1 pp CDH1  
PPP1CA pp CDH1  
PSEN1 pp CDH1  
EPHA2 pp CDH5  
BIRC6 pp CDK1

CCNA1 pp CDK1  
CCNA2 pp CDK1  
CCNB1 pp CDK1  
CCNB2 pp CDK1  
CCNE1 pp CDK1  
CDK1 pp CDK1  
GADD45A pp CDK1  
GADD45B pp CDK1  
GADD45G pp CDK1  
KAT5 pp CDK1  
LYNpp CDK1  
MYC pp CDK1  
PCNA pp CDK1  
PPP2R1A pp CDK1  
PPP2R1B pp CDK1  
TLE1 pp CDK1  
TP53 pp CDK1  
ACVR1 pp CDK14  
BMPR1Bpp CDK14  
RB1 pp CDK14  
BCL2 pp CDK2  
CCNA1 pp CDK2  
CCNA2 pp CDK2  
CCNB2 pp CDK2  
CCNE2 pp CDK2  
CDK2 pp CDK2  
HIST1H1B pp CDK2  
LYNpp CDK2  
PCNA pp CDK2  
CCNA2 pp CDK3  
CCNE1 pp CDK3  
CCNE2 pp CDK3  
CDK3 pp CDK3  
BIRC5 pp CDK4  
BMPR1Bpp CDK4  
CCND1 pp CDK4  
CCND2 pp CDK4  
CCND3 pp CDK4  
CDC45L pp CDK4  
CDC7 pp CDK4  
CDKN1C pp CDK4  
PPP2R1B pp CDK4  
ABL1 pp CDK5  
CCND2 pp CDK5

CDK5 pp CDK5  
CSNK1D pp CDK5  
GSK3B pp CDK5  
PCNA pp CDK5  
SET pp CDK5  
SYNJ1 pp CDK5  
AR pp CDK6  
CDK6 pp CDK6  
CTNNB1 pp CDK6  
MCM10 pp CDK6  
RB1 pp CDK6  
RUNX1 pp CDK6  
AKT1 pp CDKN1A  
BCCIP pp CDKN1A  
CASP3 pp CDKN1A  
CCNA1 pp CDKN1A  
CCNA2 pp CDKN1A  
CCNB1 pp CDKN1A  
CCNB2 pp CDKN1A  
CCND1 pp CDKN1A  
CCND3 pp CDKN1A  
CCNE1 pp CDKN1A  
CCNE2 pp CDKN1A  
CDC45L pp CDKN1A  
CDC5L pp CDKN1A  
CDC6 pp CDKN1A  
CDC7 pp CDKN1A  
CDK1 pp CDKN1A  
CDK14 pp CDKN1A  
CDK2 pp CDKN1A  
CDK3 pp CDKN1A  
CDK4 pp CDKN1A  
CDK6 pp CDKN1A  
CDKN1A pp CDKN1A  
CIZ1 pp CDKN1A  
DAPK3 pp CDKN1A  
ESR1 pp CDKN1A  
GADD45A pp CDKN1A  
GADD45B pp CDKN1A  
GADD45G pp CDKN1A  
MAPK8 pp CDKN1A  
MCM10 pp CDKN1A  
PARP1 pp CDKN1A  
PCNA pp CDKN1A



PIM1 pp CDKN1A  
POLD2 pp CDKN1A  
PSMA3 pp CDKN1A  
RB1 pp CDKN1A  
RNF144B pp CDKN1A  
SET pp CDKN1A  
TK1 pp CDKN1A  
TSG101 pp CDKN1A  
XRCC6 pp CDKN1A  
LIMK1 pp CDKN1C  
NR4A2 pp CDKN1C  
ATF2 pp CEBPA  
CDK2 pp CEBPA  
CDK4 pp CEBPA  
CDKN1A pp CEBPA  
CEBPA pp CEBPA  
GSK3B pp CEBPA  
HNF1A pp CEBPA  
MYC pp CEBPA  
NR3C1 pp CEBPA  
RB1 pp CEBPA  
RUNX1 pp CEBPA  
SOX10 pp CEBPA  
SOX8 pp CEBPA  
SUMO3 pp CEBPA  
CEBPG pp CEBPG  
DDIT3 pp CEBPG  
FOS pp CEBPG  
GTF2F2 pp CEBPG  
CFTR pp CFTR  
PPP2R1B pp CFTR  
PRKACA pp CFTR  
PRKCA pp CFTR  
SLC9A3R1 pp CFTR  
SLC9A3R2 pp CFTR  
BMP2 pp CHR1  
AKT1 pp CHUK  
BCL10 pp CHUK  
CHUK pp CHUK  
CREBBP pp CHUK  
IKBK1 pp CHUK  
MAP3K7 pp CHUK  
NFKB1 pp CHUK  
NFKBIA pp CHUK

NOTCH3pp CHUK  
PRKCB pp CHUK  
PRKDC pp CHUK  
PTPN11 pp CHUK  
TRAF2 pp CHUK  
AP1G1 pp CLTC  
CLTC pp CLTC  
HIP1 pp CLTC  
KIT pp CLTC  
NDRG1 pp CLTC  
TNK2 pp CLTC  
XRCC6 pp CLTC  
YWHAG pp CLTC  
CNDP2 pp CNDP2  
NDRG1 pp CNDP2  
CNOT1 pp CNOT2  
CNOT1 pp CNOT3  
CNOT2 pp CNOT3  
CNOT8 pp CNOT3  
CREBBP pp CNOT3  
CNOT1 pp CNOT8  
CNOT2 pp CNOT8  
CNTN1 pp CNTN1  
ATXN1 pp COIL  
C1QBP pp COIL  
CDK2 pp COIL  
COIL pp COIL  
CSNK2B pp COIL  
KPNA3 pp COIL  
PRMT1 pp COIL  
COL13A1 pp COL13A1  
FN1 pp COL13A1  
HSPG2 pp COL13A1  
NID1 pp COL13A1  
NID2 pp COL13A1  
SPARC pp COL13A1  
DCN pp COL14A1  
ITGA5 pp COL18A1  
MMP2 pp COL18A1  
DCN pp COL1A1  
FN1 pp COL1A1  
IGFBP3 pp COL1A1  
ITGA5 pp COL1A1  
MMP2 pp COL1A1

NID1 pp COL1A1  
P4HB pp COL1A1  
SPARC pp COL1A1  
THBS1 pp COL1A1  
DCN pp COL1A2  
FN1 pp COL1A2  
ITGB3 pp COL1A2  
P4HB pp COL1A2  
SPARC pp COL1A2  
C1QA pp COL2A1  
COL2A1 pp COL2A1  
FN1 pp COL2A1  
MMP1 pp COL2A1  
SPARC pp COL2A1  
TGFB1 pp COL2A1  
THBS1 pp COL2A1  
COL4A1 pp COL4A1  
DCN pp COL4A1  
FN1 pp COL4A1  
NID1 pp COL4A1  
DCN pp COL4A3  
FN1 pp COL4A3  
DCN pp COL4A4  
FN1 pp COL4A4  
DCN pp COL5A1  
THBS1 pp COL5A1  
NDRG1 pp COPB2  
COPS4 pp COPS4  
RCBTB2 pp COPS4  
COPS4 pp COPS5  
ESR1 pp COPS5  
HNF4A pp COPS5  
NR4A2 pp COPS5  
PPARG pp COPS5  
SMAD2 pp COPS5  
ARAF pp CPS1  
ACVR1 pp CREBBP  
CEBPA pp CREBBP  
CREBBP pp CREBBP  
ELK1 pp CREBBP  
ETS1 pp CREBBP  
ETS2 pp CREBBP  
HIF1A pp CREBBP  
HNF4A pp CREBBP

HSF1 pp CREBBP  
IKBKG pp CREBBP  
KAT2B pp CREBBP  
KAT5 pp CREBBP  
MAML1 pp CREBBP  
MYC pp CREBBP  
NCOA1 pp CREBBP  
NFE2 pp CREBBP  
NFE2L2 pp CREBBP  
PRKCD pp CREBBP  
RPS6KA1 pp CREBBP  
SREBF1 pp CREBBP  
SREBF2 pp CREBBP  
STAT1 pp CREBBP  
THRA pp CREBBP  
TP73 pp CREBBP  
YWHAB pp CRTC2  
CSF2 pp CSF2  
KITLG pp CSF2  
SDC2 pp CSF2  
AKAP9 pp CSNK1D  
ARFGAP1 pp CSNK1D  
DVL1 pp CSNK1D  
PER1 pp CSNK1D  
PER3 pp CSNK1D  
PPP1R14A pp CSNK1D  
ATF2 pp CSNK2A1  
CDK1 pp CSNK2A1  
CDKN1A pp CSNK2A1  
CREBBP pp CSNK2A1  
CSNK2A1 pp CSNK2A1  
CSNK2B pp CSNK2A1  
DVL1 pp CSNK2A1  
DVL3 pp CSNK2A1  
EEF1D pp CSNK2A1  
FGF2 pp CSNK2A1  
FOS pp CSNK2A1  
NCL pp CSNK2A1  
YWHAB pp CSNK2A1  
ATF2 pp CSNK2A2  
CREBBP pp CSNK2A2  
FGF2 pp CSNK2A2  
FOS pp CSNK2A2  
HSP90AA1 pp CSNK2A2

MAPK14pp CSNK2A2  
NCL pp CSNK2A2  
ARAF pp CSNK2B  
CDK1 pp CSNK2B  
CDKN1A pp CSNK2B  
CSNK2A2 pp CSNK2B  
CSNK2Bpp CSNK2B  
LYNpp CSNK2B  
MAPK14pp CSNK2B  
PRKCZ pp CSNK2B  
RPS6KB1 pp CSNK2B  
SHMT2 pp CSNK2B  
BCAR1 pp CSPG4  
MPDZ pp CSPG4  
TNK2 pp CSPG4  
ERBB4 pp CTGF  
HSPG2 pp CTGF  
NOV pp CTGF  
TGFB1 pp CTGF  
TGFB2 pp CTGF  
TGFB3 pp CTGF  
VEGFA pp CTGF  
CTH pp CTH  
CA9pp CTNNA1  
CDH5 pp CTNNA1  
CTNNB1pp CTNNA1  
AR pp CTNNB1  
BCL3 pp CTNNB1  
CA9pp CTNNB1  
CASP3 pp CTNNB1  
CCND1 pp CTNNB1  
CDH1 pp CTNNB1  
CDH5 pp CTNNB1  
CEBPA pp CTNNB1  
CHUK pp CTNNB1  
CREBBPpp CTNNB1  
CSNK1Dpp CTNNB1  
CSNK2A1 pp CTNNB1  
CSNK2Bpp CTNNB1  
DVL1 pp CTNNB1  
DVL3 pp CTNNB1  
EGFR pp CTNNB1  
ERBB2 pp CTNNB1  
ESR1 pp CTNNB1

EZR pp CTNNB1  
GSK3B pp CTNNB1  
HNF1A pp CTNNB1  
IKBKB pp CTNNB1  
MITF pp CTNNB1  
NDRG1 pp CTNNB1  
NF2 pp CTNNB1  
PECAM1 pp CTNNB1  
PIK3R1 pp CTNNB1  
SLC9A3R1 pp CTNNB1  
SMAD2 pp CTNNB1  
SMAD3 pp CTNNB1  
SMAD4 pp CTNNB1  
SPN pp CTNNB1  
TGFB1 pp CTNNB1  
FN1 pp CTSD  
PSAP pp CTSD  
SLC2A4 pp CTSD  
F5 pp CTSG  
LRP1 pp CTSG  
PPBP pp CTSG  
THBS1 pp CTSG  
COL18A1 pp CTSL1  
CTSL1 pp CTSL1  
RXRA pp CTSL1  
CA12 pp CUX1  
CDK1 pp CUX1  
CREBBP pp CUX1  
CTSL1 pp CUX1  
HMGB1 pp CUX1  
KAT2B pp CUX1  
RB1 pp CUX1  
AGTPBP1 pp CYCS  
APAF1 pp CYCS  
BCL2 pp CYCS  
BCL2L1 pp CYCS  
CASP9 pp CYCS  
RNF7 pp CYCS  
SNCA pp CYCS  
TRAF6 pp CYLD  
ITGB5 pp CYR61  
DAPK3 pp DAPK3  
MET pp DAPK3  
ADORA2B pp DCC

CASP3 pp DCC  
CASP9 pp DCC  
MAPK3 pp DCC  
PTK2 pp DCC  
SIAH1 pp DCC  
SIAH2 pp DCC  
AHSG pp DCN  
COL4A5 pp DCN  
COL4A6 pp DCN  
DPT pp DCN  
EGFR pp DCN  
ELN pp DCN  
FBN1 pp DCN  
FLNA pp DCN  
FN1 pp DCN  
MMP2 pp DCN  
MMP3 pp DCN  
MMP7 pp DCN  
PLA2G2A pp DCN  
SFTPD pp DCN  
TGFB1 pp DCN  
THBS1 pp DCN  
TNF pp DCN  
WISP1 pp DCN  
DCTN1 pp DCTN1  
GSK3B pp DCTN1  
ATF3 pp DDIT3  
CSNK2A1 pp DDIT3  
FOS pp DDIT3  
JUN pp DDIT3  
JUND pp DDIT3  
MAPK14 pp DDIT3  
NDRG1 pp DDX1  
DDX24 pp DDX24  
EIF3E pp DDX24  
FADD pp DDX24  
HSPA5 pp DDX24  
VDAC3 pp DDX24  
CREBBP pp DDX5  
NDRG1 pp DDX5  
PRKCA pp DDX5  
SMAD3 pp DDX5  
CYLD pp DDX58  
MAVS pp DDX58

BIRC6 pp DIABLO  
BIRC7 pp DIABLO  
CASP9 pp DIABLO  
DIABLO pp DIABLO  
AKAP5 pp DLG1  
CTNNA1 pp DLG1  
DLG1 pp DLG1  
DLGAP1 pp DLG1  
MAPK12 pp DLG1  
DLG1 pp DLG3  
DLG4 pp DLG3  
ERBB4 pp DLG3  
AKAP5 pp DLG4  
DLG4 pp DLG4  
DLGAP1 pp DLG4  
ADAM10 pp DLL1  
DLL1 pp DLL1  
NDRG1 pp DLST  
AP1G1 pp DNER  
BNIP3L pp DOK5  
CCDC85B pp DOK5  
LOX pp DPT  
NFIL3 pp DR1  
CASP10 pp DSP  
CASP9 pp DSP  
CDH5 pp DSP  
DSP pp DSP  
PECAM1 pp DSP  
PRKACA pp DSP  
VIM pp DSP  
MAPK3 pp DUSP3  
STAT1 pp DUSP3  
DVL1 pp DVL1  
SMAD2 pp DVL1  
CSNK1D pp DVL3  
DVL1 pp DVL3  
DVL3 pp DVL3  
CDK1 pp EEF1D  
EEF1D pp EEF1D  
EEF1G pp EEF1D  
PRKCA pp EEF1D  
RPS6KA1 pp EEF1D  
CDC42 pp EEF1G  
EEF1G pp EEF1G



NDRG1 pp EEF1G  
SKIL pp EEF1G  
SNAPIN pp EEF1G  
EEF2 pp EEF2  
NDRG1 pp EEF2  
PPP2CA pp EEF2  
PPP2R1A pp EEF2  
PPP2R1B pp EEF2  
TP53 pp EEF2  
ADAM10 pp EFNA1  
EEF1G pp EFNA1  
EPHA4 pp EFNA1  
EPHA5 pp EFNA1  
EPHA6 pp EFNA1  
EPHA8 pp EFNA1  
KAT5 pp EFNA1  
EPHA4 pp EFNA3  
EPHA7 pp EFNA3  
ADAM12 pp EGF  
ADRBK1 pp EGF  
DUSP3 pp EGF  
EGFpp EGF  
EGFR pp EGF  
ERBB2 pp EGF  
ERBB3 pp EGF  
LMNA pp EGF  
NRG1 pp EGF  
AGTR1 pp EGFR  
ANXA1 pp EGFR  
ATP5C1 pp EGFR  
CDH1 pp EGFR  
EGFR pp EGFR  
ERBB3 pp EGFR  
ESR1 pp EGFR  
HTTpp EGFR  
ITGA5 pp EGFR  
KRT17 pp EGFR  
KRT7 pp EGFR  
PIK3R1 pp EGFR  
PRKACA pp EGFR  
PRKCA pp EGFR  
PRKCD pp EGFR  
PTK2 pp EGFR  
PTPN11 pp EGFR

RIPK1 pp EGFR  
TNC pp EGFR  
TNK2 pp EGFR  
XRCC6 pp EGFR  
YWHAZ pp EGFR  
EPAS1 pp EGLN3  
HIF1A pp EGLN3  
HIF3A pp EGLN3  
OS9 pp EGLN3  
EIF2B3 pp EIF2B3  
STC2 pp EIF2B3  
NDRG1 pp EIF2S3  
EPAS1 pp EIF3E  
NDRG1 pp EIF3E  
MAP2K1 pp ELK1  
MAPK14 pp ELK1  
MAPK3 pp ELK1  
SRF pp ELK1  
TAOK2 pp ELK1  
SRF pp ELK4  
FBN1 pp ELN  
LOX pp ELN  
NID2 pp ELN  
SPINK1 pp ELN  
ENG pp ENG  
TGFB1 pp ENG  
TGFB2 pp ENG  
TGFB3 pp ENG  
TGFB1 pp ENG  
TGFB2 pp ENG  
TGFB3 pp ENG  
ANXA11 pp ENO2  
SUMO4 pp ENO2  
ENO2 pp ENSA  
PRKD1 pp EPAS1  
SMAD3 pp EPAS1  
EFNA1 pp EPHA1  
EFNA1 pp EPHA2  
EFNA3 pp EPHA2  
EGFR pp EPHA2  
EPHA2 pp EPHA2  
PTK2 pp EPHA2  
EFNA1 pp EPHA3  
EPHA3 pp EPHA3

PIM1 pp EPHA3  
TP53 pp EPHA3  
EPHA4 pp EPHA4  
EFNA3 pp EPHA5  
EFNA1 pp EPHA7  
EPHA7 pp EPHA7  
EPHA8 pp EPHA8  
EFNA1 pp EPHB1  
EPHB1 pp EPHB1  
EPHB2 pp EPHB2  
MMP2 pp EPHB2  
SYNJ1 pp EPHB2  
VEGFA pp EPHB2  
EPOR pp EPOR  
GNB2L1 pp EPOR  
KIT pp EPOR  
KITLG pp EPOR  
KLK3 pp EPOR  
LYNpp EPOR  
MAPK1 pp EPOR  
MAPK3 pp EPOR  
PIK3R1 pp EPOR  
PTPN11 pp EPOR  
CAV1 pp ERBB2  
DLG4 pp ERBB2  
EGFR pp ERBB2  
ERBB2 pp ERBB2  
ERBB3 pp ERBB2  
ERBB4 pp ERBB2  
ESR1 pp ERBB2  
ITGA5 pp ERBB2  
NF2 pp ERBB2  
PIK3R1 pp ERBB2  
PTK2 pp ERBB2  
CDK5 pp ERBB3  
ERBB3 pp ERBB3  
ERBB4 pp ERBB3  
PTK2 pp ERBB3  
DLG1 pp ERBB4  
DLG4 pp ERBB4  
EGFR pp ERBB4  
ERBB4 pp ERBB4  
ERC2 pp ERC2  
PPFIA4 pp ERC2

ERO1L pp ERO1L  
PDIA3 pp ERO1L  
PDILT pp ERO1L  
ERO1L pp ERP44  
AKT1 pp ESR1  
AR pp ESR1  
CAV1 pp ESR1  
CCND1 pp ESR1  
CHUK pp ESR1  
COBRA1pp ESR1  
CREBBPpp ESR1  
CSNK2Bpp ESR1  
DDX5 pp ESR1  
ESR1 pp ESR1  
ESR2 pp ESR1  
GADD45B pp ESR1  
GADD45G pp ESR1  
HSP90AA1 pp ESR1  
JUNpp ESR1  
LCK pp ESR1  
MAPK1 pp ESR1  
MAPK14pp ESR1  
MED1 pp ESR1  
MNAT1 pp ESR1  
NCOA1 pp ESR1  
NCOR2 pp ESR1  
NR1H4 pp ESR1  
PGRpp ESR1  
PIK3R1 pp ESR1  
PPARGC1A pp ESR1  
RBM9 pp ESR1  
RPS6KA1 pp ESR1  
SMAD2 pp ESR1  
SMARCD3 pp ESR1  
TBPpp ESR1  
TP53 pp ESR1  
XBP1 pp ESR1  
AKT1 pp ESR2  
ESR2 pp ESR2  
LCK pp ESR2  
MED1 pp ESR2  
NCOA1 pp ESR2  
NCOR2 pp ESR2  
RBM9 pp ESR2

SMAD2 pp ESR2  
SMAD4 pp ESR2  
SREBF1 pp ESR2  
ESR1 pp ESRRRA  
ESRRRA pp ESRRRA  
ESRRG pp ESRRRA  
EXOSC6 pp ESRRRA  
NR0B1 pp ESRRRA  
ESRRRA pp ESRRG  
PPARGC1A pp ESRRG  
ETS1 pp ETS1  
ETS2 pp ETS1  
FOS pp ETS1  
JUN pp ETS1  
MAF pp ETS1  
MAPK1 pp ETS1  
MAPK3 pp ETS1  
RUNX2 pp ETS1  
UBE2I pp ETS1  
ETS2 pp ETS2  
JUN pp ETS2  
POU5F1 pp ETS2  
CREBBP pp EWSR1  
EWSR1 pp EWSR1  
NDRG1 pp EWSR1  
POU5F1 pp EWSR1  
PRKCA pp EWSR1  
TAF1 pp EWSR1  
YWHAG pp EWSR1  
EXOSC6 pp EXOSC6  
ADORA2B pp EZR  
ARF6 pp EZR  
ARHGDIB pp EZR  
CDH1 pp EZR  
CDK5 pp EZR  
CFTR pp EZR  
CLIC5 pp EZR  
DLG1 pp EZR  
EGFR pp EZR  
EZR pp EZR  
FAS pp EZR  
FASLG pp EZR  
ICAM1 pp EZR  
ICAM2 pp EZR

ICAM3 pp EZR  
L1CAM pp EZR  
LCK pp EZR  
MSN pp EZR  
NF2 pp EZR  
PALLD pp EZR  
PIK3R1 pp EZR  
PRKAR2A pp EZR  
PRKCA pp EZR  
PTK2 pp EZR  
PTPRC pp EZR  
RDX pp EZR  
ROCK1 pp EZR  
S100P pp EZR  
SCYL3 pp EZR  
SDC2 pp EZR  
SELL pp EZR  
SELP pp EZR  
SLC9A3R1 pp EZR  
SLC9A3R2 pp EZR  
SPN pp EZR  
TBC1D10A pp EZR  
TMEM8B pp EZR  
TSC1 pp EZR  
VCAM1 pp EZR  
WWOX pp EZR  
F10 pp F10  
CSNK2A1 pp F11R  
F11R pp F11R  
PRKCA pp F11R  
F2 pp F2  
F5 pp F2  
F8 pp F2  
IGFBP3 pp F2  
IGFBP5 pp F2  
THBS1 pp F2  
CTSG pp F2R  
F2 pp F2R  
ITGAV pp F2R  
PLG pp F2R  
CSNK2A1 pp F5  
F10 pp F5  
F5 pp F5  
PROC pp F5

F10 pp F8  
ANK3 pp FADD  
IKBKG pp FADD  
RIPK1 pp FADD  
STAT1 pp FADD  
TRAF2 pp FADD  
ANK3 pp FAS  
CD47 pp FAS  
EGFR pp FAS  
FADD pp FAS  
FAS pp FAS  
FASLG pp FAS  
LCK pp FAS  
RIPK1 pp FAS  
SUMO1 pp FAS  
TNFSF13 pp FAS  
UBE2I pp FAS  
FADD pp FASLG  
FN1 pp FASLG  
LCK pp FASLG  
MMP7 pp FASLG  
PIK3R1 pp FASLG  
SUMO1 pp FASLG  
EWSR1 pp FASN  
FASN pp FASN  
NDRG1 pp FASN  
LTBP1 pp FBN1  
PPARGC1A pp FBXW7  
CSNK2B pp FGF2  
FGF2 pp FGF2  
HSPG2 pp FGF2  
PF4 pp FGF2  
PRMT1 pp FGF2  
EPHA4 pp FGFR2  
ITGA5 pp FGFR2  
ATF3 pp FGFR3  
C6orf47 pp FGFR3  
EPHA4 pp FGFR3  
FGF2 pp FGFR3  
FGFR3 pp FGFR3  
FKBP1A pp FKBP1A  
TGFB1 pp FKBP1A  
YY1 pp FKBP1A  
MAPK14 pp FKBP8

AR pp FLNA  
CAV1 pp FLNA  
ERBB3 pp FLNA  
ITGB5 pp FLNA  
LMNA pp FLNA  
MAP2K4pp FLNA  
MAPK14pp FLNA  
MTNR1B pp FLNA  
PCBP2 pp FLNA  
PSEN2 pp FLNA  
RAC1 pp FLNA  
SMAD3 pp FLNA  
TNIP2 pp FLNA  
TRAF2 pp FLNA  
YWHAG pp FLNA  
FLT3LG pp FLT3LG  
FLT4 pp FLT4  
COL4A5 pp FN1  
COL4A6 pp FN1  
IGFBP3 pp FN1  
ITGA5 pp FN1  
ITGB1 pp FN1  
ITGB3 pp FN1  
ITGB6 pp FN1  
KLK3 pp FN1  
LTBP1 pp FN1  
NOV pp FN1  
REG3A pp FN1  
SDC2 pp FN1  
SPARC pp FN1  
TGM2 pp FN1  
THBS1 pp FN1  
TNC pp FN1  
VHL pp FN1  
CDC42 pp FNBP1  
FASLG pp FNBP1  
FNBP1 pp FNBP1  
ATF7 pp FOS  
BATF pp FOS  
COBRA1pp FOS  
EEF1D pp FOS  
ELK1 pp FOS  
ELK4 pp FOS  
EPHB2 pp FOS



FOS pp FOS  
GATA4 pp FOS  
GTF2F2 pp FOS  
JUN pp FOS  
JUND pp FOS  
MAF pp FOS  
MAP3K7 pp FOS  
MAPK1 pp FOS  
NCOA1 pp FOS  
NCOR2 pp FOS  
NFATC3 pp FOS  
OPTN pp FOS  
PRKACA pp FOS  
PSMC5 pp FOS  
RB1 pp FOS  
RPS6KA1 pp FOS  
RPS6KA4 pp FOS  
RUNX2 pp FOS  
SCHIP1 pp FOS  
SMARCD1 pp FOS  
SUMO1 pp FOS  
SUMO2 pp FOS  
SUMO3 pp FOS  
SUMO4 pp FOS  
TAF1 pp FOS  
TBP pp FOS  
TRO pp FOS  
TSC22D3 pp FOS  
USF2 pp FOS  
WDR65 pp FOS  
XBP1 pp FOS  
AP2M1 pp FURIN  
FLNA pp FURIN  
FURIN pp FURIN  
EGFR pp GAB1  
EPOR pp GAB1  
MAPK1 pp GAB1  
MAPK3 pp GAB1  
MET pp GAB1  
PTPN11 pp GAB1  
PRKCD pp GABRA1  
PRKCG pp GABRA1  
PRKCB pp GABRB2  
GABRG2 pp GABRG2

PRKCA pp GABRG2  
PRKCB pp GABRG2  
GADD45A pp GADD45A  
HIST2H2BE pp GADD45A  
PCNA pp GADD45A  
PPARA pp GADD45A  
RXRA pp GADD45A  
GADD45G pp GADD45B  
MAP2K7 pp GADD45B  
C1orf103 pp GADD45G  
EEF1G pp GADD45G  
KAT5 pp GADD45G  
PIAS4 pp GADD45G  
AR pp GAPDH  
ATXN1 pp GAPDH  
EGFR pp GAPDH  
GAPDH pp GAPDH  
HTT pp GAPDH  
KAT5 pp GAPDH  
NR1H4 pp GAPDH  
PGK1 pp GAPDH  
PLD2 pp GAPDH  
SLC2A4 pp GAPDH  
SUMO4 pp GAPDH  
GDF15 pp GDF15  
GIPC1 pp GIPC1  
C1orf103 pp GIT1  
DDX24 pp GIT1  
GIT1 pp GIT1  
PPFIA4 pp GIT1  
TERF1 pp GIT1  
YWHAG pp GIT1  
CAV1 pp GJA1  
CSNK1D pp GJA1  
MAPK1 pp GJA1  
MAPK3 pp GJA1  
NOV pp GJA1  
PRKCA pp GJA1  
PRKCB pp GJA1  
PRKCE pp GJA1  
PRKCG pp GJA1  
CREBBP pp GMEB1  
GMEB1 pp GMEB1  
SMAD3 pp GMEB1

CDKN1A pp GMNN  
AR pp GNB2L1  
CCNA1 pp GNB2L1  
CDKN1A pp GNB2L1  
GNB2L1 pp GNB2L1  
HABP4 pp GNB2L1  
PABPC1 pp GNB2L1  
PDE4D pp GNB2L1  
PTN pp GNB2L1  
RB1 pp GNB2L1  
STAT1 pp GNB2L1  
SUMO4 pp GNB2L1  
TP73 pp GNB2L1  
TUBB pp GNB2L1  
CSNK2A1 pp GPI  
GPI pp GPI  
BMP2 pp GREM1  
YWHAH pp GREM1  
DLG3 pp GRIN2C  
DLG4 pp GRIN2C  
DLGAP1 pp GRIN2C  
IL16 pp GRIN2C  
INADL pp GRIN2C  
AR pp GRIP1  
CSPG4 pp GRIP1  
CSPG4 pp GRIP2  
AGTR1 pp GRK5  
CAV1 pp GRK5  
GIT1 pp GRK5  
GRK5 pp GRK5  
GIT1 pp GRK6  
GRK6 pp GRK6  
AKT1 pp GSK3B  
AR pp GSK3B  
BCL3 pp GSK3B  
GSK3B pp GSK3B  
IKBKG pp GSK3B  
MYC pp GSK3B  
PPARGC1A pp GSK3B  
PRKACA pp GSK3B  
PRKCZ pp GSK3B  
GSTP1 pp GSTP1  
MAPK8 pp GSTP1  
SUMO4 pp GSTP1

TGM2 pp GSTP1  
AR pp GTF2F2  
GTF2F2 pp GTF2F2  
TBP pp GTF2F2  
FGFR3 pp GTF3C1  
GZMB pp GZMB  
ENO2 pp HABP4  
PRKCA pp HABP4  
PRKCB pp HABP4  
PRKCD pp HABP4  
PRKCG pp HABP4  
PRKCZ pp HABP4  
PRMT1 pp HABP4  
VIM pp HABP4  
CREB3 pp HCFC1  
HCFC1 pp HCFC1  
PPARGC1A pp HCFC1  
ZBTB17 pp HCFC1  
CSNK2A1 pp HCLS1  
LYN pp HCLS1  
BCL3 pp HDAC1  
CBFA2T3 pp HDAC1  
CREBBP pp HDAC1  
CSNK2A1 pp HDAC1  
CSNK2A2 pp HDAC1  
HDAC1 pp HDAC1  
HDAC2 pp HDAC1  
HIF1A pp HDAC1  
KAT5 pp HDAC1  
KDM1A pp HDAC1  
PHF21A pp HDAC1  
PIAS4 pp HDAC1  
PPP2R1B pp HDAC1  
RBPJ pp HDAC1  
RUNX1T1 pp HDAC1  
SIN3A pp HDAC1  
SMAD2 pp HDAC1  
TP53 pp HDAC1  
UBE2I pp HDAC1  
CDKN1A pp HDAC11  
PHYHIP pp HDAC11  
CSNK2A1 pp HDAC2  
CSNK2A2 pp HDAC2  
IKZF4 pp HDAC2

PHF21A pp HDAC2  
RCOR1 pp HDAC2  
SIN3A pp HDAC2  
THRA pp HDAC2  
THRB pp HDAC2  
TP53 pp HDAC2  
FN1 pp HGF  
HGF pp HGF  
KLKB1 pp HGF  
MET pp HGF  
SDC2 pp HGF  
COPS5 pp HIF1A  
CSNK2A1 pp HIF1A  
CTNNB1 pp HIF1A  
HIF3A pp HIF1A  
OS9 pp HIF1A  
STAT3 pp HIF1A  
HIP1 pp HIP1  
LOX pp HIST1H1B  
SIRT1 pp HIST1H1B  
TFAP2B pp HIST1H2AC  
AKT1 pp HIST2H2BE  
ATF2 pp HIST2H2BE  
ENO2 pp HK1  
SLC2A4 pp HK2  
ERBB2 pp HLA-A  
HLA-A pp HLA-A  
KIR3DL2 pp HLA-A  
PDIA3 pp HLA-A  
PRKCA pp HLA-A  
PHF21A pp HMG20B  
VIM pp HMG20B  
AES pp HMGB1  
AR pp HMGB1  
CASP3 pp HMGB1  
HNRNPK pp HMGB1  
NFKB1 pp HMGB1  
PLG pp HMGB1  
POU5F1 pp HMGB1  
PRKCA pp HMGB1  
PRKDC pp HMGB1  
RB1 pp HMGB1  
RELA pp HMGB1  
TAF1 pp HMGB1

TBP pp HMGB1  
TLE1 pp HMGB1  
TLE2 pp HMGB1  
TP53 pp HMGB1  
TP73 pp HMGB1  
PGRpp HMGB2  
POU5F1 pp HMGB2  
PRKDC pp HMGB2  
SET pp HMGB2  
TP53 pp HMGB2  
CREBBP pp HNF1A  
FOS pp HNF1A  
HNF1A pp HNF1A  
HNF4A pp HNF1A  
KAT2B pp HNF1A  
TLE1 pp HNF1A  
ESR1 pp HNF4A  
HNF4A pp HNF4A  
MAPK14pp HNF4A  
MED1 pp HNF4A  
SMAD2 pp HNF4A  
SMAD3 pp HNF4A  
SMAD4 pp HNF4A  
SREBF2 pp HNF4A  
NDRG1 pp HNRNPF  
SUMO4 pp HNRNPF  
HNRNPFpp HNRNPH1  
NDRG1 pp HNRNPH1  
SUMO4 pp HNRNPH1  
YWHAG pp HNRNPH1  
DDX1 pp HNRNPK  
HNRNPK pp HNRNPK  
PCBP2 pp HNRNPK  
PRKCD pp HNRNPK  
PRMT1 pp HNRNPK  
ACTB pp HNRNPU  
CASP3 pp HNRNPU  
NDRG1 pp HNRNPU  
PRMT1 pp HNRNPU  
PTPN11 pp HNRNPU  
ANK3 pp HOOK1  
HOOK1 pp HOOK1  
MAFF pp HOXD12  
NDRG1 pp HSD17B4

CSNK2A1 pp HSF1  
ENO2 pp HSF1  
HSF1 pp HSF1  
MAPK3 pp HSF1  
MAPK8 pp HSF1  
PRKDC pp HSF1  
STAT1 pp HSF1  
SUMO1 pp HSF1  
TAF1 pp HSF1  
TBP pp HSF1  
XRCC5 pp HSF1  
XRCC6 pp HSF1  
AKT1 pp HSP90AA1  
AR pp HSP90AA1  
CHUK pp HSP90AA1  
CSNK2A1 pp HSP90AA1  
ERBB2 pp HSP90AA1  
HIF1A pp HSP90AA1  
HSP90AA1 pp HSP90AA1  
IKBKB pp HSP90AA1  
IKBKG pp HSP90AA1  
MAPK1 pp HSP90AA1  
MYC pp HSP90AA1  
NDRG1 pp HSP90AA1  
NOS3 pp HSP90AA1  
PIM1 pp HSP90AA1  
PPARA pp HSP90AA1  
PRKDC pp HSP90AA1  
RAF1 pp HSP90AA1  
RIPK1 pp HSP90AA1  
SLC2A4 pp HSP90AA1  
TP53 pp HSP90AA1  
F8 pp HSPA5  
MTNR1B pp HSPA5  
NDRG1 pp HSPA5  
SUMO4 pp HSPA5  
YWHAB pp HSPA5  
CASP3 pp HSPD1  
CASP9 pp HSPD1  
HIST2H2BE pp HSPD1  
HSPD1 pp HSPD1  
ITGB1 pp HSPD1  
PPP2R1A pp HSPD1  
PPP2R1B pp HSPD1

PRKACA pp HSPD1  
SUMO4 pp HSPD1  
YWHAG pp HSPD1  
FBN1 pp HSPG2  
ITGB1 pp HSPG2  
NID2 pp HSPG2  
PDGFA pp HSPG2  
SPARC pp HSPG2  
CSNK2A1 pp HSPH1  
CSNK2A2 pp HSPH1  
AKT1 pp HTT  
CASP3 pp HTT  
CREBBP pp HTT  
DLG4 pp HTT  
GIT1 pp HTT  
HIP1 pp HTT  
OPTN pp HTT  
PIAS4 pp HTT  
SIN3A pp HTT  
SP1 pp HTT  
TBP pp HTT  
TGM2 pp HTT  
TP53 pp HTT  
TUBB pp HTT  
XRCC6 pp HTT  
EGFR pp ICAM1  
ICAM1 pp ICAM1  
IL2RG pp ICAM1  
MSN pp ICAM1  
SPN pp ICAM1  
MSN pp ICAM2  
RDX pp ICAM2  
MSN pp ICAM3  
ITGAV pp ICAM4  
ITGB1 pp ICAM4  
CDK2 pp ID3  
ELK1 pp ID3  
ELK4 pp ID3  
ID3 pp ID3  
MAPK1 pp IER3  
EIF3E pp IFIT1  
IFIT1 pp IFIT3  
IFIT2 pp IFIT3  
IFIT3 pp IFIT3



IGFALS pp IGF1  
NOV pp IGF1  
DOK5 pp IGF1R  
ESR1 pp IGF1R  
GIPC1 pp IGF1R  
GNB2L1 pp IGF1R  
IGF1 pp IGF1R  
IGF1R pp IGF1R  
IGF2 pp IGF1R  
ITGB1 pp IGF1R  
PIK3R1 pp IGF1R  
PTPN11 pp IGF1R  
STAT3 pp IGF1R  
YWHAB pp IGF1R  
YWHAE pp IGF1R  
YWHAG pp IGF1R  
YWHAZ pp IGF1R  
NOV pp IGF2  
IGF1 pp IGFBP1  
IGF2 pp IGFBP1  
MMP26 pp IGFBP1  
TF pp IGFBP1  
ADAM12 pp IGFBP3  
CSNK2A1 pp IGFBP3  
CTSD pp IGFBP3  
CTSG pp IGFBP3  
CTSL1 pp IGFBP3  
GPI pp IGFBP3  
GTF3C1 pp IGFBP3  
IGF1 pp IGFBP3  
IGF1R pp IGFBP3  
IGF2 pp IGFBP3  
IGFALS pp IGFBP3  
KLK3 pp IGFBP3  
KLKB1 pp IGFBP3  
KPNB1 pp IGFBP3  
LTBP1 pp IGFBP3  
MMP1 pp IGFBP3  
MMP2 pp IGFBP3  
MMP3 pp IGFBP3  
PAPPA2 pp IGFBP3  
RXRA pp IGFBP3  
TF pp IGFBP3  
ADAM12 pp IGFBP5

FN1 pp IGFBP5  
IGF1 pp IGFBP5  
IGF2 pp IGFBP5  
IGFALS pp IGFBP5  
KPNB1 pp IGFBP5  
SPP1 pp IGFBP5  
TF pp IGFBP5  
THBS1 pp IGFBP5  
ATF3 pp IGSF21  
IGSF21 pp IGSF21  
PRMT1 pp IGSF21  
TMSB4Xpp IGSF21  
ACVR1 pp IKBKB  
AKT1 pp IKBKB  
CHUK pp IKBKB  
IKBKB pp IKBKB  
IKBKG pp IKBKB  
MAP3K7pp IKBKB  
PRKCB pp IKBKB  
PRKCZ pp IKBKB  
BCL10 pp IKBKG  
CARD8 pp IKBKG  
CYLD pp IKBKG  
IKBKG pp IKBKG  
NFKB1 pp IKBKG  
NFKBIA pp IKBKG  
RIPK1 pp IKBKG  
RNF11 pp IKBKG  
TNIP2 pp IKBKG  
ZFAND5 pp IKBKG  
IKZF4 pp IKZF4  
NRG1 pp IKZF4  
SIN3A pp IKZF4  
SIN3B pp IKZF4  
IL15RA pp IL15  
TRAF2 pp IL15RA  
CASP3 pp IL16  
CDK1 pp IL16  
CSNK2A1 pp IL16  
CSNK2A2 pp IL16  
IL16pp IL16  
ENO2 pp IL17B  
FNDC6 pp IL20  
GNB2L1 pp IL2RB

IL15pp IL2RB  
IL15RA pp IL2RB  
IL2RG pp IL2RB  
LCK pp IL2RB  
PIK3R1 pp IL2RB  
STAT1 pp IL2RB  
IL15pp IL2RG  
IL15RA pp IL2RG  
STAT1 pp IL2RG  
NDRG1 pp ILF3  
CAV1 pp ILK  
GSK3B pp ILK  
MAPK12pp INADL  
PRDM1 pp IRF4  
TRAF2 pp IRF4  
ANGPT1 pp ITGA5  
ANGPTL3 pp ITGA5  
ARHGAP5 pp ITGA5  
AUP1 pp ITGA5  
CD9pp ITGA5  
FLT4 pp ITGA5  
GIPC1 pp ITGA5  
ITGB1 pp ITGA5  
ITGB3 pp ITGA5  
ITGB5 pp ITGA5  
L1CAM pp ITGA5  
NISCH pp ITGA5  
PECAM1pp ITGA5  
SPP1 pp ITGA5  
TNC pp ITGA5  
ADAM9 pp ITGAV  
ANGPTL3 pp ITGAV  
AUP1 pp ITGAV  
AZGP1 pp ITGAV  
CD47 pp ITGAV  
CYR61 pp ITGAV  
EDIL3 pp ITGAV  
ITGB8 pp ITGAV  
L1CAM pp ITGAV  
MMP14 pp ITGAV  
P2RY2 pp ITGAV  
PAK4 pp ITGAV  
PLP1 pp ITGAV  
PTK2 pp ITGAV

THY1 pp ITGAV  
ARHGAP5 pp ITGB1  
CD9pp ITGB1  
FLNA pp ITGB1  
FLT4 pp ITGB1  
GNB2L1 pp ITGB1  
ILK pp ITGB1  
ITGAV pp ITGB1  
ITGB1 pp ITGB1  
ITGB1BP3 pp ITGB1  
NF2 pp ITGB1  
PRKCA pp ITGB1  
PRKCE pp ITGB1  
PTK2 pp ITGB1  
SLC3A2 pp ITGB1  
SPP1 pp ITGB1  
TGM2 pp ITGB1  
VCAM1 pp ITGB1  
YWHAB pp ITGB1  
CDKN1A pp ITGB1BP3  
AKT1 pp ITGB3  
ANGPTL3 pp ITGB3  
ILK pp ITGB3  
ITGAV pp ITGB3  
ITGB3 pp ITGB3  
P2RY2 pp ITGB3  
PDGFRApp ITGB3  
PTK2 pp ITGB3  
TGM2 pp ITGB3  
THBS1 pp ITGB3  
THY1 pp ITGB3  
GNB2L1 pp ITGB5  
ITGAV pp ITGB5  
ITGB5 pp ITGB5  
LTBP1 pp ITGB5  
P2RY2 pp ITGB5  
PAK4 pp ITGB5  
ZBTB17 pp ITGB5  
ITGAV pp ITGB6  
TGFB1 pp ITGB6  
FURIN pp ITM2C  
MTNR1B pp ITM2C  
RNF7 pp ITM2C  
STT3A pp ITM2C

ABL1 pp JUN  
AR pp JUN  
ATF3 pp JUN  
BATF pp JUN  
COBRA1pp JUN  
COPS5 pp JUN  
CREBBPpp JUN  
CSNK2A1 pp JUN  
FBXW7 pp JUN  
FOSL2 pp JUN  
GTF2F2 pp JUN  
HCFC1 pp JUN  
HIF1A pp JUN  
JUN pp JUN  
MAF pp JUN  
MAPK3 pp JUN  
MAPK8 pp JUN  
MYBBP1A pp JUN  
NCOA1 pp JUN  
PRKD1 pp JUN  
PRKDC pp JUN  
RB1 pp JUN  
RUNX2 pp JUN  
SMAD2 pp JUN  
SMAD3 pp JUN  
SMAD4 pp JUN  
SMARCD1 pp JUN  
SMARCD3 pp JUN  
SOX10 pp JUN  
SOX8 pp JUN  
SP1 pp JUN  
STAT1 pp JUN  
STAT4 pp JUN  
SUMO1 pp JUN  
SUMO2 pp JUN  
SUMO3 pp JUN  
SUMO4 pp JUN  
TAF1 pp JUN  
TBP pp JUN  
TSC22D3 pp JUN  
UBE2I pp JUN  
BATF pp JUNB  
ESR1 pp JUNB  
FOS pp JUNB

FOSL2 pp JUNB  
JUNB pp JUNB  
MAPK14pp JUNB  
MAPK8 pp JUNB  
SMAD3 pp JUNB  
SMAD4 pp JUNB  
ATF3 pp JUND  
BATF pp JUND  
COPS5 pp JUND  
ESR1 pp JUND  
FOSL2 pp JUND  
MAPK8 pp JUND  
NFE2L2 pp JUND  
SMAD4 pp JUND  
TBP pp JUND  
AR pp KAT2B  
KAT2B pp KAT2B  
SMAD2 pp KAT2B  
SMAD3 pp KAT2B  
TP73 pp KAT2B  
ATXN1 pp KAT5  
ESR1 pp KAT5  
HABP4 pp KAT5  
TP53 pp KAT5  
KCNC1 pp KCNC1  
ALG10 pp KCNH1  
KCNH5 pp KCNH1  
ALG10 pp KCNH2  
PRKACA pp KCNH2  
YWHAE pp KCNH2  
KCNQ3 pp KCNQ3  
KCNQ3 pp KCNQ4  
AR pp KDM1A  
PHF21A pp KDM1A  
NDRG1 pp KIF5B  
YWHAB pp KIF5B  
YWHAZ pp KIF5B  
KIT pp KIT  
KITLG pp KIT  
LYNpp KIT  
MPDZ pp KIT  
PIK3R1 pp KIT  
PRKCA pp KIT  
PTPN11 pp KIT

SPRED1 pp KIT  
CLEC11A pp KITLG  
CMA1 pp KITLG  
FLT3LG pp KITLG  
KITLG pp KITLG  
PIK3CD pp KITLG  
PGRpp KLF9  
KPNB1 pp KPNA3  
NFKB1 pp KPNA3  
KPNB1 pp KPNB1  
PIAS4 pp KPNB1  
PLCD1 pp KPNB1  
SMAD2 pp KPNB1  
SMAD3 pp KPNB1  
SNUPN pp KPNB1  
KRT6A pp KRT17  
DSP pp KRT6A  
ATF7IP pp KRT7  
KRT17 pp KRT7  
LAPTM5pp KRT7  
CNTN1 pp L1CAM  
CSNK2A1 pp L1CAM  
MSN pp L1CAM  
RPS6KA1 pp L1CAM  
CEBPZ pp LAG3  
NID2 pp LAMC1  
BCAR1 pp LCK  
CDC42 pp LCK  
DLG1 pp LCK  
HSP90AA1 pp LCK  
KIT pp LCK  
LCK pp LCK  
MAPK1 pp LCK  
MAPK3 pp LCK  
NR3C1 pp LCK  
PECAM1pp LCK  
PLD2 pp LCK  
PRKACA pp LCK  
PRKCA pp LCK  
PTPN11 pp LCK  
PTPRC pp LCK  
RAF1 pp LCK  
SH2D2A pp LCK  
THY1 pp LCK

LDHA pp LDHA  
NDRG1 pp LDHA  
CA12 pp LGALS7  
LGALS7 pp LGALS7  
LIMK1 pp LIMK1  
PAK4 pp LIMK1  
ROCK1 pp LIMK1  
CDK1 pp LMNA  
FOS pp LMNA  
KAT5 pp LMNA  
LMNA pp LMNA  
PRKCA pp LMNA  
RB1 pp LMNA  
SREBF1 pp LMNA  
SUMO4 pp LMNA  
SMAD9 pp LNPEP  
TNKS pp LNPEP  
DHDDS pp LOX  
HIST1H2BJ pp LOX  
LOX pp LOX  
BACE1 pp LRP1  
C4BPA pp LRP1  
CALR pp LRP1  
CANX pp LRP1  
CTGF pp LRP1  
DLG4 pp LRP1  
F8 pp LRP1  
FURIN pp LRP1  
GIPC1 pp LRP1  
KAT5 pp LRP1  
LRP1 pp LRP1  
MMP14 pp LRP1  
PRKACA pp LRP1  
THBS1 pp LRP1  
SGOL1 pp LRRC59  
LTBP1 pp LTBP1  
TGM2 pp LTBP1  
BCAR1 pp LYN  
CASP3 pp LYN  
DLG4 pp LYN  
EGFR pp LYN  
HNRNPK pp LYN  
IL2RB pp LYN  
LYNpp LYN



MAPK3 pp LYN  
PECAM1pp LYN  
PRKDC pp LYN  
PTK2 pp LYN  
PTPRC pp LYN  
ESR2 pp MAD2L1  
MAD2L1pp MAD2L1  
UBD pp MAD2L1  
CREBBPpp MAF  
MAF pp MAF  
USF2 pp MAF  
MAFF pp MAFF  
NFE2 pp MAFF  
PSAP pp MAFF  
MAML1 pp MAML1  
RBPJ pp MAML1  
CREBBPpp MAML2  
NOTCH3pp MAML2  
NOTCH3pp MAML3  
MAOA pp MAOA  
NDRG1 pp MAOA  
ARAF pp MAP2K1  
BIRC6 pp MAP2K1  
CDK5 pp MAP2K1  
EGFR pp MAP2K1  
MAP2K1pp MAP2K1  
MAP3K4pp MAP2K1  
MAPK1 pp MAP2K1  
MAPK3 pp MAP2K1  
MYC pp MAP2K1  
PEBP1 pp MAP2K1  
RAF1 pp MAP2K1  
TRAF3 pp MAP2K1  
DUSP3 pp MAP2K2  
MAP2K2pp MAP2K2  
RAF1 pp MAP2K2  
AKT1 pp MAP2K4  
MAP2K4pp MAP2K4  
MAP3K2pp MAP2K4  
MAP3K4pp MAP2K4  
MAP3K7pp MAP2K4  
BAD pp MAP2K5  
DCTN1 pp MAP2K6  
MAP2K6pp MAP2K6

MAP3K4pp MAP2K6  
MAP3K7pp MAP2K6  
PKN1 pp MAP2K6  
PLCB2 pp MAP2K6  
RELA pp MAP2K6  
SMAD7 pp MAP2K6  
TAOK2 pp MAP2K6  
MAP2K7pp MAP2K7  
MAP3K2pp MAP2K7  
TRAF6 pp MAP2K7  
MAP2K4pp MAP3K12  
MAP2K7pp MAP3K12  
MAP2K5pp MAP3K2  
NFKBIA pp MAP3K2  
SMURF1pp MAP3K2  
WNK1 pp MAP3K2  
GADD45A pp MAP3K4  
GADD45B pp MAP3K4  
GADD45G pp MAP3K4  
MAP3K4pp MAP3K4  
MAPK13pp MAP3K4  
RAC1 pp MAP3K4  
RUNX2 pp MAP3K4  
AKT1 pp MAP3K5  
CDKN1A pp MAP3K5  
GADD45B pp MAP3K5  
IGF1R pp MAP3K5  
MAP2K6pp MAP3K5  
MAP2K7pp MAP3K5  
MAP3K2pp MAP3K5  
MAP3K5pp MAP3K5  
MAP3K7pp MAP3K5  
PPP3R1 pp MAP3K5  
YWHAE pp MAP3K5  
MAP3K7pp MAP3K7  
MAPK14pp MAP3K7  
NAIP pp MAP3K7  
PEBP1 pp MAP3K7  
RELA pp MAP3K7  
SMAD7 pp MAP3K7  
CDK1 pp MAP4  
ENO2 pp MAP4  
NR1I3 pp MAP4  
RXRB pp MAP4

TUBB pp MAP4  
C1QBP pp MAPK1  
DUSP3 pp MAPK1  
EGFR pp MAPK1  
ELK1 pp MAPK1  
JUND pp MAPK1  
MAP2K2pp MAPK1  
MAPK1 pp MAPK1  
MAPK14pp MAPK1  
MAPK8 pp MAPK1  
MITF pp MAPK1  
PEBP1 pp MAPK1  
PRKCE pp MAPK1  
RPS6KA4 pp MAPK1  
RPS6KB1 pp MAPK1  
SREBF2 pp MAPK1  
TNIP1 pp MAPK1  
DLG3 pp MAPK12  
DLG4 pp MAPK12  
MAP2K4pp MAPK12  
MAP2K6pp MAPK12  
MAPK12pp MAPK12  
PKN1 pp MAPK12  
MAP2K6pp MAPK13  
SMAD4 pp MAPK13  
BCL2 pp MAPK14  
GADD45A pp MAPK14  
MAP2K1pp MAPK14  
MAP2K4pp MAPK14  
MAP2K6pp MAPK14  
MAPK3 pp MAPK14  
MAPK8 pp MAPK14  
MITF pp MAPK14  
SMAD7 pp MAPK14  
STAT1 pp MAPK14  
TRAF6 pp MAPK14  
BCL2 pp MAPK3  
BCL3 pp MAPK3  
CAV1 pp MAPK3  
ESR1 pp MAPK3  
GATA4 pp MAPK3  
HIF1A pp MAPK3  
IER3 pp MAPK3  
JUND pp MAPK3

MAP2K2pp MAPK3  
MAPK3 pp MAPK3  
MAPK8 pp MAPK3  
PTPN11 pp MAPK3  
RPS6KA4 pp MAPK3  
BCL2L1 pp MAPK8  
ELK1 pp MAPK8  
MAP2K4pp MAPK8  
MAP2K7pp MAPK8  
MAP3K2pp MAPK8  
MAP3K7pp MAPK8  
PRKD1 pp MAPK8  
SMAD3 pp MAPK8  
TP73 pp MAPK8  
TRAF6 pp MAPK8  
WWOX pp MAPK8  
MAP3K7pp MAVS  
TICAM1 pp MAVS  
TRAF6 pp MAVS  
CSNK2A1 pp MAX  
EPAS1 pp MAX  
HIF1A pp MAX  
MAPK14pp MAX  
MAX pp MAX  
MXI1 pp MAX  
MYC pp MAX  
SMAD3 pp MAX  
SMAD4 pp MAX  
ATF7IP pp MBD1  
OASL pp MBD1  
CASP3 pp MCL1  
GSK3B pp MCL1  
MAPK1 pp MCL1  
MCL1 pp MCL1  
CDC5L pp MCM10  
CCNB2 pp MCM2  
CDC6 pp MCM2  
CDC7 pp MCM2  
CDK4 pp MCM2  
CDK6 pp MCM2  
MCM10 pp MCM2  
MCM2 pp MCM2  
TBP pp MCM2  
GATA4 pp MED1

MED1 pp MED1  
NR1I3 pp MED1  
PPARGC1A pp MED1  
THRA pp MED1  
THRB pp MED1  
CTNNB1 pp MET  
EGFR pp MET  
FAS pp MET  
MET pp MET  
PTPN11 pp MET  
PTPRB pp MET  
FOS pp MITF  
GSK3B pp MITF  
SUMO1 pp MITF  
UBE2I pp MITF  
AFF1 pp MLLT3  
MLLT3 pp MLLT3  
CSNK2B pp MME  
LYN pp MME  
NDRG1 pp MME  
PIK3R1 pp MME  
CMA1 pp MMP1  
MMP7 pp MMP1  
BCAR1 pp MMP14  
BACE1 pp MMP2  
HSP90AA1 pp MMP2  
ITGAV pp MMP2  
MMP14 pp MMP2  
TGFB1 pp MMP2  
THBS1 pp MMP2  
MMP3 pp MMP3  
PLG pp MMP3  
NT5C2 pp MOBKL2B  
F11R pp MPDZ  
MPDZ pp MPDZ  
CA12 pp MRPL9  
MSN pp MSN  
ROCK1 pp MSN  
SELL pp MSN  
SLC9A3R1 pp MSN  
SPN pp MSN  
TSC1 pp MSN  
MTHFD1 pp MTHFD1  
MTNR1B pp MTNR1B

SMC3 pp MXI1  
BCL2 pp MYC  
CDC6 pp MYC  
CSNK2A1 pp MYC  
CSNK2A2 pp MYC  
FBXW7 pp MYC  
KAT5 pp MYC  
MAPK3 pp MYC  
MAPK8 pp MYC  
MXI1 pp MYC  
SMAD2 pp MYC  
SMAD3 pp MYC  
TFAP2B pp MYC  
TP73 pp MYC  
TUBA4A pp MYC  
YY1 pp MYC  
ZBTB17 pp MYC  
EWSR1 pp MYOZ2  
CASP9 pp NAIP  
NAIP pp NAIP  
ENO2 pp NAT9  
BNIP3 pp NCBP1  
HNRNPF pp NCBP1  
HNRNPH1 pp NCBP1  
RPS6KB1 pp NCBP1  
NDRG1 pp NCL  
PARP1 pp NCL  
PPARGC1A pp NCL  
PRKCZ pp NCL  
TP53 pp NCL  
COPS5 pp NCOA1  
DDX5 pp NCOA1  
ESRRA pp NCOA1  
ESRRG pp NCOA1  
HIF1A pp NCOA1  
HNF4A pp NCOA1  
KAT2B pp NCOA1  
MAPK1 pp NCOA1  
NCOA1 pp NCOA1  
NR1H4 pp NCOA1  
NR1I2 pp NCOA1  
NR1I3 pp NCOA1  
PGR pp NCOA1  
PPARG pp NCOA1

PPARGC1A pp NCOA1  
PRMT1 pp NCOA1  
SUMO1 pp NCOA1  
AR pp NCOR2  
CBFA2T2 pp NCOR2  
CHUK pp NCOR2  
HDAC1 pp NCOR2  
NFKBIA pp NCOR2  
NR1I2 pp NCOR2  
RUNX1 pp NCOR2  
SKIL pp NCOR2  
SNW1 pp NCOR2  
SP1 pp NCOR2  
THRA pp NCOR2  
THRB pp NCOR2  
ARL4D pp NDRG1  
PHYHIP pp NDRG1  
PRKACA pp NDRG1  
ANXA9 pp NDUFA4L2  
KAT5 pp NDUFA4L2  
ARRB2 pp NDUFS7  
ENO2 pp NDUFS7  
NF2 pp NF2  
SCHIP1 pp NF2  
JUN pp NFE2L1  
JUNB pp NFE2L1  
JUND pp NFE2L1  
MAFF pp NFE2L1  
CASP3 pp NFE2L2  
JUN pp NFE2L2  
MAFF pp NFE2L2  
NFE2 pp NFE2L2  
PPARG pp NFE2L2  
PRKCD pp NFE2L2  
CREB3 pp NFIL3  
NFIL3 pp NFIL3  
AR pp NFKB1  
ATF3 pp NFKB1  
CTNNB1 pp NFKB1  
ESR1 pp NFKB1  
ETS1 pp NFKB1  
FOS pp NFKB1  
GSK3B pp NFKB1  
HDAC1 pp NFKB1

IKBKB pp NFKB1  
KAT5 pp NFKB1  
NCOA1 pp NFKB1  
NCOR2 pp NFKB1  
NFKB1 pp NFKB1  
PARP1 pp NFKB1  
PRKACA pp NFKB1  
RIPK1 pp NFKB1  
RPS3 pp NFKB1  
RXRA pp NFKB1  
SIN3A pp NFKB1  
TNIP2 pp NFKB1  
TSC22D3 pp NFKB1  
ARRB2 pp NFKBIA  
CAPN2 pp NFKBIA  
CSNK2A1 pp NFKBIA  
HDAC1 pp NFKBIA  
IKBKB pp NFKBIA  
LCK pp NFKBIA  
NFKB1 pp NFKBIA  
NFKBIA pp NFKBIA  
PIK3R1 pp NFKBIA  
RELA pp NFKBIA  
RPS6KA1 pp NFKBIA  
SUMO1 pp NFKBIA  
SUMO4 pp NFKBIA  
TP53 pp NFKBIA  
VCPpp NFKBIA  
CEBPZ pp NFYB  
MYC pp NFYB  
SP1 pp NFYB  
TBP pp NFYB  
TP53 pp NFYB  
TP73 pp NFYB  
HSPG2 pp NID1  
ITGAV pp NID1  
ITGB3 pp NID1  
LAMC1 pp NID1  
NID1 pp NID1  
SKIL pp NID1  
SKIL pp NID2  
APAF1 pp NLRP1  
NLRP1 pp NLRP1  
NLRP1 pp NOD1



NOD1 pp NOD1  
DLG4 pp NOS1  
HSP90AA1 pp NOS1  
PRKACA pp NOS1  
PRKCA pp NOS1  
AKT1 pp NOS3  
CAV1 pp NOS3  
NOS3 pp NOS3  
PPP2R5A pp NOS3  
SP1 pp NOS3  
DLL1 pp NOTCH3  
JAG1 pp NOTCH3  
JAG2 pp NOTCH3  
KAT2B pp NOTCH3  
MAML1 pp NOTCH3  
PSEN1 pp NOTCH3  
SNW1 pp NOTCH3  
DLL1 pp NOV  
ESR1 pp NR0B1  
ESR2 pp NR0B1  
NCOR2 pp NR1H4  
PPARGC1A pp NR1H4  
SMARCD3 pp NR1H4  
NR1I2 pp NR1I2  
PSMC5 pp NR1I2  
AR pp NR3C1  
CREBBP pp NR3C1  
ETS1 pp NR3C1  
ETS2 pp NR3C1  
GRIP1 pp NR3C1  
HNRNPU pp NR3C1  
HSP90AA1 pp NR3C1  
JUN pp NR3C1  
MAPK1 pp NR3C1  
MAPK8 pp NR3C1  
NCL pp NR3C1  
NCOA1 pp NR3C1  
NCOR2 pp NR3C1  
NFKB1 pp NR3C1  
NR3C1 pp NR3C1  
PPARGC1A pp NR3C1  
PRKACA pp NR3C1  
PRKDC pp NR3C1  
RAF1 pp NR3C1

RELA pp NR3C1  
SMAD3 pp NR3C1  
SMARCD1 pp NR3C1  
SUMO1 pp NR3C1  
SUMO4 pp NR3C1  
TBP pp NR3C1  
TP53 pp NR3C1  
TSG101 pp NR3C1  
UBE2I pp NR3C1  
RPS6KA1 pp NR4A2  
VHL pp NR4A2  
MAGI3 pp NRCAM  
NRCAM pp NRCAM  
MAFF pp NRF1  
PPARGC1A pp NRF1  
ADAM19 pp NRG1  
ERBB3 pp NRG1  
ERBB4 pp NRG1  
LIMK1 pp NRG1  
FGF2 pp NRP1  
GIPC1 pp NRP1  
NRP1 pp NRP1  
NRP2 pp NRP1  
NT5C2 pp NT5C2  
UBD pp NUB1  
ATF3 pp NUF2  
PIM1 pp NUMA1  
TNKS pp NUMA1  
THRA pp OASL  
ODF1 pp ODF1  
SPAG4 pp ODF1  
RNF11 pp OPTN  
CD47 pp P2RY2  
ERO1L pp P4HB  
P4HB pp P4HB  
PTN pp P4HB  
YWHAG pp P4HB  
NDRG1 pp PABPC1  
PABPC1 pp PABPC1  
YWHAG pp PABPC1  
DLST pp PAK4  
FGFR2 pp PAK4  
PAK4 pp PAK4  
YWHAZ pp PAK4

ITGB5 pp PALLD  
IGFBP5 pp PAPP2  
CTSG pp PARP1  
GZMB pp PARP1  
PARP1 pp PARP1  
PCNA pp PARP1  
PRKDC pp PARP1  
RBM14 pp PARP1  
RXRA pp PARP1  
TP53 pp PARP1  
XRCC5 pp PARP1  
EWSR1 pp PCBP1  
HNRNPK pp PCBP1  
LMNA pp PCBP1  
PABPC1 pp PCBP1  
PABPC1 pp PCBP2  
PCBP1 pp PCBP2  
PCBP2 pp PCBP2  
PCBP1 pp PCBP4  
QKI pp PCBP4  
RNF138 pp PCBP4  
PCCB pp PCCA  
PCCB pp PCCB  
CDC6 pp PCNA  
CDK6 pp PCNA  
CDKN1C pp PCNA  
GADD45B pp PCNA  
GADD45G pp PCNA  
HDAC1 pp PCNA  
MCL1 pp PCNA  
MYBBP1A pp PCNA  
PCNA pp PCNA  
POLD2 pp PCNA  
PPP1CA pp PCNA  
PRKDC pp PCNA  
XRCC5 pp PCNA  
APOA1 pp PDE1A  
AKAP6 pp PDE4D  
PDE4D pp PDE4D  
PDE4DIP pp PDE4D  
PRKACA pp PDE4D  
DUSP3 pp PDGFA  
FURIN pp PDGFA  
PDAP1 pp PDGFA

PDGFA pp PDGFA  
PDGFRApp PDGFA  
SPARC pp PDGFA  
CAV1 pp PDGFRA  
ITGAV pp PDGFRA  
PDGFRApp PDGFRA  
PIK3R1 pp PDGFRA  
PTPN11 pp PDGFRA  
SLC9A3R1 pp PDGFRA  
STAT3 pp PDGFRA  
DLAT pp PDHA1  
PDHA1 pp PDHA1  
PDK1 pp PDHA1  
PDK2 pp PDHA1  
PDK4 pp PDHA1  
BACE1 pp PDIA3  
SUMO4 pp PDIA3  
DLAT pp PDK1  
PDK2 pp PDK1  
AKT1 pp PDK2  
DLAT pp PDK2  
HTTpp PDK2  
PDK2 pp PDK2  
DLAT pp PDK4  
PDK4 pp PDK4  
TRIM63 pp PDK4  
STK35 pp PDLIM1  
VIMpp PDLIM1  
ADRBK1 pp PEBP1  
CHUK pp PEBP1  
IKBKB pp PEBP1  
PEBP1 pp PEBP1  
PRKCA pp PEBP1  
PRKCB pp PEBP1  
PRKCD pp PEBP1  
PRKCG pp PEBP1  
PRKCZ pp PEBP1  
ITGB3 pp PECAM1  
PECAM1pp PECAM1  
PRKCE pp PECAM1  
PTPN11 pp PECAM1  
XRCC6 pp PECAM1  
HIF1A pp PER1  
PER2 pp PER1

PER3 pp PER1  
CSNK1Dpp PER2  
PER3 pp PER2  
PF4 pp PF4  
PROC pp PF4  
GBE1 pp PGD  
HIF1A pp PGK1  
HSPH1 pp PGK1  
SUMO4 pp PGK1  
CCNA2 pp PGR  
CSNK2A1 pp PGR  
PGRpp PGR  
XRCC6 pp PGR  
LPXN pp PHF21A  
NFE2 pp PHYHIP  
PHYHIP pp PHYHIP  
COIL pp PIAS4  
NR4A2 pp PIAS4  
TICAM1 pp PIAS4  
PIK3CD pp PIK3CD  
ABL1 pp PIK3R1  
ADAM12 pp PIK3R1  
AKT1 pp PIK3R1  
ANK3 pp PIK3R1  
ARAF pp PIK3R1  
BCAR1 pp PIK3R1  
ERBB3 pp PIK3R1  
GAB1 pp PIK3R1  
LCK pp PIK3R1  
MAPK8 pp PIK3R1  
MET pp PIK3R1  
PECAM1pp PIK3R1  
PIK3CD pp PIK3R1  
PIK3R1 pp PIK3R1  
PTK2 pp PIK3R1  
PTPN11 pp PIK3R1  
RAC1 pp PIK3R1  
TEKpp PIK3R1  
TGFBR1 pp PIK3R1  
TYRO3 pp PIK3R1  
YWHAGpp PIK3R1  
ARAF pp PKM2  
NDRG1 pp PKM2  
PKM2 pp PKM2

TRIM63 pp PKM2  
CASP3 pp PKN1  
CD44 pp PKN1  
PKN1 pp PKN1  
CASP3 pp PKN2  
MAP3K2pp PKN2  
PLA2G2A pp PLA2G2A  
SLC9A3R1 pp PLCB2  
EGFR pp PLD2  
F10 pp PLG  
IGF2 pp PLG  
IGFBP3 pp PLG  
KLK3 pp PLG  
LAMA3 pp PLG  
MMP7 pp PLG  
PLGpp PLG  
SERPINF2 pp PLG  
SPARC pp PLG  
THBS1 pp PLG  
PLOD2 pp PLOD2  
DHX37 pp PLXNA2  
FNBP4 pp PLXNA2  
HACE1 pp PLXNA2  
IFT80 pp PLXNA2  
KIAA1199 pp PLXNA2  
UBAP2L pp PLXNA2  
ATP5C1 pp POLA2  
DDX24 pp POLA2  
FGFR3 pp POLA2  
IGFBP3 pp POLA2  
CDK2 pp POLD2  
POLR2C pp POLR2C  
STC2 pp POLR2C  
KAT5 pp POLR3F  
STC2 pp POLR3F  
FOXD3 pp POU5F1  
MNAT1 pp POU5F1  
SOX10 pp POU5F1  
SOX2 pp POU5F1  
SOX8 pp POU5F1  
GADD45B pp PPARA  
GADD45G pp PPARA  
MAPK1 pp PPARA  
MAPK3 pp PPARA

MED1 pp PPARA  
NCOA1 pp PPARA  
NCOR2 pp PPARA  
PPARA pp PPARA  
PPARGC1A pp PPARA  
RXRA pp PPARA  
CNOT1 pp PPARG  
GADD45B pp PPARG  
GADD45G pp PPARG  
MAPK1 pp PPARG  
MAPK8 pp PPARG  
MED1 pp PPARG  
NCOR2 pp PPARG  
NR0B1 pp PPARG  
PPARG pp PPARG  
PPARGC1A pp PPARG  
RXRB pp PPARG  
SMARCD3 pp PPARG  
ESR2 pp PPARGC1A  
ESRRA pp PPARGC1A  
HNF4A pp PPARGC1A  
MAPK14pp PPARGC1A  
MYBBP1A pp PPARGC1A  
NR1I2 pp PPARGC1A  
NR1I3 pp PPARGC1A  
THRB pp PPARGC1A  
EFNA1 pp PPBP  
PPBP pp PPBP  
CAST pp PPFIA4  
PPHLN1 pp PPHLN1  
CDC5L pp PPP1CA  
MAPK1 pp PPP1CA  
MAPK3 pp PPP1CA  
PPP1CA pp PPP1CA  
PPP1R8 pp PPP1CA  
RB1 pp PPP1CA  
SPRED1 pp PPP1CA  
TP53 pp PPP1CA  
PRKCA pp PPP1R14A  
PRKCE pp PPP1R14A  
PRKCZ pp PPP1R14A  
PRKD1 pp PPP1R14A  
CDC5L pp PPP1R8  
CSNK2A1 pp PPP1R8

CSNK2A2 pp PPP1R8  
HDAC2 pp PPP1R8  
LYNpp PPP1R8  
PRKACA pp PPP1R8  
BMPR1Bpp PPP2CA  
DVL3 pp PPP2CA  
MAPK1 pp PPP2CA  
MAPK3 pp PPP2CA  
PPP1CA pp PPP2CA  
PPP2R1A pp PPP2CA  
PPP2R1B pp PPP2CA  
PPP2R2A pp PPP2CA  
PPP2R5B pp PPP2CA  
PPP2R5Epp PPP2CA  
PTNpp PPP2CA  
RELA pp PPP2CA  
RPS6KB1 pp PPP2CA  
SGOL1 pp PPP2CA  
SGOL1 pp PPP2CB  
SGOL1 pp PPP2R1A  
SMAD2 pp PPP2R1A  
AKAP9 pp PPP2R1B  
PPP2R2A pp PPP2R1B  
PPP2R5D pp PPP2R1B  
SGOL1 pp PPP2R1B  
NDRG1 pp PPP2R2A  
PPP2R1A pp PPP2R2A  
PPP2R1A pp PPP2R5A  
SGOL1 pp PPP2R5A  
IER3 pp PPP2R5B  
SGOL1 pp PPP2R5B  
IER3 pp PPP2R5C  
PPP2CA pp PPP2R5C  
PPP2R1B pp PPP2R5C  
SGOL1 pp PPP2R5C  
SGOL1 pp PPP2R5D  
PPP2R1B pp PPP2R5E  
SGOL1 pp PPP2R5E  
AKAP5 pp PPP3CA  
ATP2B4 pp PPP3CA  
BCL2 pp PPP3CA  
CABIN1 pp PPP3CA  
CASP3 pp PPP3CA  
CRTC2 pp PPP3CA



FKBP1A pp PPP3CA  
FKBP8 pp PPP3CA  
GABRA1 pp PPP3CA  
GABRB2pp PPP3CA  
GABRG2 pp PPP3CA  
MYOZ2 pp PPP3CA  
MYOZ3 pp PPP3CA  
PPP3CA pp PPP3CA  
PPP3R1 pp PPP3CA  
PRKCZ pp PPP3CA  
RCAN2 pp PPP3CA  
SOD1 pp PPP3CA  
SYNJ1 pp PPP3CA  
BCL2 pp PRKACA  
ESR1 pp PRKACA  
SLC9A3R2 pp PRKACA  
VIMpp PRKACA  
AKAP12 pp PRKAR2A  
AKAP5 pp PRKAR2A  
AKAP6 pp PRKAR2A  
AKAP9 pp PRKAR2A  
CBFA2T3 pp PRKAR2A  
CFTR pp PRKAR2A  
PRKAR2A pp PRKAR2A  
AKAP12 pp PRKCA  
AKAP5 pp PRKCA  
C1QBP pp PRKCA  
DLG4 pp PRKCA  
FAS pp PRKCA  
FLNA pp PRKCA  
GNB2L1 pp PRKCA  
HSP90AA1 pp PRKCA  
PLD2 pp PRKCA  
PPARA pp PRKCA  
PRKCA pp PRKCA  
PRKCZ pp PRKCA  
RAC1 pp PRKCA  
YWHAG pp PRKCA  
YWHAZ pp PRKCA  
BMP2 pp PRKCB  
GNB2L1 pp PRKCB  
GSK3B pp PRKCB  
KIT pp PRKCB  
PPP2CB pp PRKCB

PRKCB pp PRKCB  
YWHAG pp PRKCB  
ADAM9 pp PRKCD  
C1QBP pp PRKCD  
ESRRA pp PRKCD  
GNB2L1 pp PRKCD  
HSP90AA1 pp PRKCD  
IGF1R pp PRKCD  
LCK pp PRKCD  
LYN pp PRKCD  
MAPK1 pp PRKCD  
MAPK3 pp PRKCD  
PLD2 pp PRKCD  
PPARA pp PRKCD  
PPP1CA pp PRKCD  
PPP2CA pp PRKCD  
PPP2R5C pp PRKCD  
PRKCD pp PRKCD  
PRKCZ pp PRKCD  
PRKDC pp PRKCD  
RAC1 pp PRKCD  
RAF1 pp PRKCD  
RUNX2 pp PRKCD  
YWHAG pp PRKCD  
AKAP9 pp PRKCE  
CFTR pp PRKCE  
COPB2 pp PRKCE  
GNB2L1 pp PRKCE  
HK2 pp PRKCE  
MAPK3 pp PRKCE  
PRKCE pp PRKCE  
PRKD1 pp PRKCE  
PPP1R14A pp PRKCG  
YWHAB pp PRKCG  
YWHAG pp PRKCG  
C1QBP pp PRKCZ  
CASP3 pp PRKCZ  
DAPK3 pp PRKCZ  
FADD pp PRKCZ  
MAP2K1 pp PRKCZ  
MAP2K5 pp PRKCZ  
MAPK1 pp PRKCZ  
MAPK3 pp PRKCZ  
PRKCZ pp PRKCZ

RHOA pp PRKCZ  
TRAF6 pp PRKCZ  
ABL1 pp PRKD1  
EGFR pp PRKD1  
GNB2L1 pp PRKD1  
IGF1R pp PRKD1  
PRKD1 pp PRKD1  
AKT1 pp PRKDC  
CASP3 pp PRKDC  
GZMB pp PRKDC  
MAPK8 pp PRKDC  
PRKDC pp PRKDC  
SGOL1 pp PRKDC  
SP1 pp PRKDC  
XRCC5 pp PRKDC  
YWHAG pp PRKDC  
AR pp PRMT1  
ESR1 pp PRMT1  
ILF3 pp PRMT1  
PRMT1 pp PRMT1  
QKI pp PRMT1  
YWHAG pp PRMT1  
F2 pp PROC  
F8 pp PROC  
PROC pp PROC  
PROS1 pp PROC  
C4BPB pp PROS1  
F10 pp PROS1  
F2 pp PROS1  
F5 pp PROS1  
F8 pp PROS1  
TYRO3 pp PROS1  
MAFF pp PRRX1  
SOX10 pp PRRX1  
SRF pp PRRX1  
ACTG1 pp PRSS23  
EFNA3 pp PRSS23  
GRK6 pp PRSS23  
BACE1 pp PSAP  
PSAP pp PSAP  
SMAD2 pp PSAP  
BACE1 pp PSEN1  
BCL2 pp PSEN1  
BCL2L1 pp PSEN1

CASP3 pp PSEN1  
CDK5 pp PSEN1  
CTNNA1pp PSEN1  
CTNNB1pp PSEN1  
DLL1 pp PSEN1  
FBXW7 pp PSEN1  
FLNA pp PSEN1  
GSK3B pp PSEN1  
PIK3R1 pp PSEN1  
PRKACA pp PSEN1  
PRKCZ pp PSEN1  
PSEN1 pp PSEN1  
UBQLN1pp PSEN1  
CASP3 pp PSEN2  
CSNK1Dpp PSEN2  
CSNK2A1 pp PSEN2  
CTNNB1pp PSEN2  
NOTCH3pp PSEN2  
UBQLN1pp PSEN2  
CSNK2A1 pp PSMA3  
NDRG1 pp PSMC2  
PSMD2 pp PSMC2  
SKIL pp PSMC2  
SUMO4 pp PSMC2  
TBP pp PSMC2  
NDRG1 pp PSMC3  
PSMC3 pp PSMC3  
PSMC5 pp PSMC3  
VHL pp PSMC3  
ESR1 pp PSMC5  
THRB pp PSMC5  
NDRG1 pp PSMD2  
PSMD2 pp PSMD2  
PTNpp PSMD2  
CCDC85B pp PSMF1  
QKI pp PSMF1  
TRAF2 pp PSMF1  
CASP3 pp PTBP1  
PCBP1 pp PTBP1  
PCBP2 pp PTBP1  
PRKACA pp PTBP1  
PTBP1 pp PTBP1  
PTBP2 pp PTBP2  
QKI pp PTBP2

HK2pp PTGDS  
BAT5 pp PTGS2  
CAV1 pp PTGS2  
NUCB1 pp PTGS2  
PTGS2 pp PTGS2  
CD47 pp PTK2  
CSPG4 pp PTK2  
EPHB2 pp PTK2  
FLT4 pp PTK2  
GIT1 pp PTK2  
GSK3B pp PTK2  
GZMB pp PTK2  
LCK pp PTK2  
LPXN pp PTK2  
PTK2 pp PTK2  
ATP5C1 pp PTN  
GADD45G pp PTN  
GSTP1 pp PTN  
KPNB1 pp PTN  
MLLT3 pp PTN  
PIAS4 pp PTN  
PTNpp PTN  
CAV1 pp PTPN11  
CDH5 pp PTPN11  
EPHA2 pp PTPN11  
ERBB2 pp PTPN11  
FLT4 pp PTPN11  
MAP3K4pp PTPN11  
PRKCA pp PTPN11  
PRKCB pp PTPN11  
PTK2 pp PTPN11  
CDH5 pp PTPRB  
CNTN1 pp PTPRB  
CNTNAP1 pp PTPRB  
F11R pp PTPRB  
MAGI3 pp PTPRB  
NRCAM pp PTPRB  
TEKpp PTPRB  
TNC pp PTPRB  
CSNK2A1 pp PTPRC  
CSNK2A2 pp PTPRC  
PTPRC pp PTPRC  
RNF11 pp PTPRC  
DAZ4 pp QKI

FUBP3 pp QKI  
HCLS1 pp QKI  
HNRNPK pp QKI  
PCBP1 pp QKI  
PCBP2 pp QKI  
PTBP1 pp QKI  
CDKN1A pp RAB1A  
RAB5A pp RAB5A  
SDCBP pp RAB5A  
TBC1D3C pp RAB5A  
TBC1D3F pp RAB5A  
AKT1 pp RAC1  
ARHGDIB pp RAC1  
CASP3 pp RAC1  
DVL1 pp RAC1  
RAC1 pp RAC1  
RPS6KB1 pp RAC1  
SET pp RAC1  
TBC1D3F pp RAC1  
AGTR1 pp RAF1  
AKT1 pp RAF1  
AR pp RAF1  
CPS1 pp RAF1  
IL2RB pp RAF1  
MAP3K5 pp RAF1  
MAPK1 pp RAF1  
MAPK3 pp RAF1  
MYC pp RAF1  
PEBP1 pp RAF1  
PKM2 pp RAF1  
PRKACA pp RAF1  
PRKCA pp RAF1  
PRKCE pp RAF1  
PRKCZ pp RAF1  
RAF1 pp RAF1  
RB1 pp RAF1  
TSC22D3 pp RAF1  
YWHAB pp RAF1  
YWHAE pp RAF1  
YWHAG pp RAF1  
YWHAZ pp RAF1  
ABL1 pp RB1  
AR pp RB1  
CASP10 pp RB1

CASP3 pp RB1  
CASP9 pp RB1  
CCNA1 pp RB1  
CCND2 pp RB1  
CDK1 pp RB1  
CDK2 pp RB1  
CDK4 pp RB1  
HDAC1 pp RB1  
MAPK1 pp RB1  
MNAT1 pp RB1  
MYC pp RB1  
PIK3R1 pp RB1  
PRKCB pp RB1  
RB1 pp RB1  
SNW1 pp RB1  
SP1 pp RB1  
TAF1 pp RB1  
TGM2 pp RB1  
QKI pp RBM14  
ATXN1 pp RBM9  
QKI pp RBM9  
RBPMS pp RBM9  
HMGB1 pp RBPJ  
KAT2B pp RBPJ  
NCOR2 pp RBPJ  
NOTCH3 pp RBPJ  
SNW1 pp RBPJ  
ATXN1 pp RBPMS  
EWSR1 pp RBPMS  
QKI pp RBPMS  
RBPMS pp RBPMS  
SERF2 pp RBPMS  
GSK3B pp RCAN1  
MAPK3 pp RCAN1  
PPP3CA pp RCAN1  
RCBTB2 pp RCBTB2  
KDM1A pp RCOR1  
PHF21A pp RCOR1  
L1CAM pp RDX  
ROCK1 pp RDX  
SLC9A3R1 pp RDX  
SLC9A3R2 pp RDX  
AES pp RELA  
AR pp RELA

CHUK pp RELA  
CREBBP pp RELA  
CSNK2A1 pp RELA  
DDX1 pp RELA  
ESR1 pp RELA  
FOS pp RELA  
HDAC1 pp RELA  
HDAC2 pp RELA  
IKBKB pp RELA  
JUN pp RELA  
KAT2B pp RELA  
MYC pp RELA  
NCOR2 pp RELA  
NFKB1 pp RELA  
PARP1 pp RELA  
PGR pp RELA  
PPARA pp RELA  
PPP2R1B pp RELA  
PRKACA pp RELA  
PRKCZ pp RELA  
RELA pp RELA  
RXRA pp RELA  
SIN3A pp RELA  
SIRT1 pp RELA  
SP1 pp RELA  
SRF pp RELA  
TAF1 pp RELA  
TBP pp RELA  
TGM2 pp RELA  
TSC22D3 pp RELA  
ARHGDIB pp RHOA  
CAV1 pp RHOA  
CNTNAP1 pp RHOA  
FLNA pp RHOA  
PKN1 pp RHOA  
PKN2 pp RHOA  
PRKACA pp RHOA  
PRKCA pp RHOA  
RHOA pp RHOA  
ROCK1 pp RHOA  
SMURF1 pp RHOA  
TGM2 pp RHOA  
BNIP3L pp RINT1  
CCDC50 pp RIPK1



PTK2 pp RIPK1  
RIPK1 pp RIPK1  
RNF11 pp RIPK1  
TNFAIP3pp RIPK1  
QKI pp RNF138  
CSNK2A1 pp RNF7  
CSNK2B pp RNF7  
CASP3 pp ROCK1  
PTK2 pp ROCK1  
ROCK1 pp ROCK1  
SMAD2 pp ROCK1  
TSG101 pp ROCK1  
SGOL1 pp RPL10A  
NDRG1 pp RPL24  
SGOL1 pp RPL28  
SMAD4 pp RPL28  
NDRG1 pp RPL3  
NDRG1 pp RPL4  
RPL7 pp RPL7  
SGOL1 pp RPL7  
SGOL1 pp RPL7A  
PTNpp RPLP1  
RPLP1 pp RPLP1  
SGOL1 pp RPLP1  
XRCC6 pp RPLP1  
NDRG1 pp RPN2  
NDRG1 pp RPS16  
NDRG1 pp RPS20  
NDRG1 pp RPS26  
NDRG1 pp RPS3  
RELA pp RPS3  
NDRG1 pp RPS6  
RPS6KB1 pp RPS6  
MAPK1 pp RPS6KA1  
MAPK3 pp RPS6KA1  
MITF pp RPS6KA1  
RPS6KA1 pp RPS6KA1  
MAP2K1pp RPS6KA4  
MAPK14pp RPS6KA4  
RPS6KA4 pp RPS6KA4  
CDK1 pp RPS6KB1  
MAPK3 pp RPS6KB1  
MAPK8 pp RPS6KB1  
PDK1 pp RPS6KB1

NDRG1 pp RPS8  
CBFA2T2 pp RUNX1  
CBFA2T3 pp RUNX1  
FOS pp RUNX1  
JUN pp RUNX1  
TLE1 pp RUNX1  
TLE2 pp RUNX1  
CBFA2T3 pp RUNX1T1  
HSP90AA1 pp RUNX1T1  
ID3 pp RUNX1T1  
KPNB1 pp RUNX1T1  
NCOR2 pp RUNX1T1  
PRKAR2A pp RUNX1T1  
RUNX1T1 pp RUNX1T1  
SIN3A pp RUNX1T1  
ZNF652 pp RUNX1T1  
AR pp RUNX2  
CDK1 pp RUNX2  
RB1 pp RUNX2  
SMAD2 pp RUNX2  
SMAD3 pp RUNX2  
XRCC5 pp RUNX2  
XRCC6 pp RUNX2  
BCL3 pp RUVBL2  
CTNNB1 pp RUVBL2  
HDAC1 pp RUVBL2  
NDRG1 pp RUVBL2  
ACVR1 pp RXRA  
CNOT1 pp RXRA  
CTNNB1 pp RXRA  
ESR1 pp RXRA  
GADD45G pp RXRA  
MAPK1 pp RXRA  
MED1 pp RXRA  
NCOA1 pp RXRA  
NCOR2 pp RXRA  
NR1H4 pp RXRA  
NR1I2 pp RXRA  
NR1I3 pp RXRA  
NR4A2 pp RXRA  
PPARG pp RXRA  
PPARGC1A pp RXRA  
PSMC5 pp RXRA  
SMAD2 pp RXRA

SMARCD3 pp RXRA  
SP1 pp RXRA  
SRF pp RXRA  
TBP pp RXRA  
THRA pp RXRA  
THRB pp RXRA  
NCOA1 pp RXRB  
NR1I2 pp RXRB  
NR4A2 pp RXRB  
RXRB pp RXRB  
THRA pp RXRB  
THRB pp RXRB  
COPS5 pp S100A7  
EGFR pp S100A7  
S100A7 pp S100A7  
TGM2 pp S100A7  
NDRG1 pp S100B  
S100B pp S100B  
TNIP1 pp S100B  
TP53 pp S100B  
S100P pp S100P  
INSIG2 pp SCAP  
SCAP pp SCAP  
SCHIP1 pp SCHIP1  
ANK3 pp SCN1B  
CNTN1 pp SCNN1B  
CASK pp SDC2  
EPHB2 pp SDC2  
FGF2 pp SDC2  
KAL1 pp SDC2  
LAMA3 pp SDC2  
NF1 pp SDC2  
PF4 pp SDC2  
PRKCA pp SDC2  
PRKCB pp SDC2  
PRKCG pp SDC2  
REG3A pp SDC2  
SDCBP pp SDC2  
SPARC pp SDC2  
TNFSF13 pp SDC2  
TRAPPC4 pp SDC2  
EPHB2 pp SDCBP  
NF2 pp SDCBP  
RNF11 pp SDCBP

SDCBP pp SDCBP  
DCTN1 pp SEC23A  
NDRG1 pp SEC23A  
SELP pp SELP  
NRP1 pp SEMA3F  
NRP2 pp SEMA3F  
QKI pp SERF2  
F2 pp SERPINC1  
PLG pp SERPINC1  
SDC2 pp SERPINC1  
SERPINC1 pp SERPINC1  
SERPINF2 pp SERPINF2  
TGM2 pp SERPINF2  
PPP2CA pp SET  
PPP2R1B pp SET  
SET pp SET  
SGOL1 pp SET  
C1QBP pp SFRS1  
PPARGC1A pp SFRS4  
PPARGC1A pp SFRS5  
PPARGC1A pp SFRS6  
SFRS4 pp SFRS6  
SFTPD pp SFTPD  
SGOL1 pp SGOL1  
CA12 pp SGSM2  
EGFR pp SGSM2  
PTN pp SGSM2  
MAP3K2 pp SH2D2A  
A2M pp SHBG  
ACTB pp SHBG  
COL1A2 pp SHBG  
CTSD pp SHBG  
FLNA pp SHBG  
PKM2 pp SHBG  
PTGDS pp SHBG  
SEMA3F pp SHBG  
SHBG pp SHBG  
NDRG1 pp SHMT2  
SHMT2 pp SHMT2  
AFF1 pp SIAH1  
GAPDH pp SIAH1  
SIAH1 pp SIAH1  
SLC9A3R2 pp SIAH1  
AFF1 pp SIAH2

ENO2 pp SIGIRR  
SIGIRR pp SIGIRR  
HCFC1 pp SIN3A  
MXI1 pp SIN3A  
HDAC1 pp SIN3B  
MXI1 pp SIN3B  
HNF4A pp SIRT1  
PPARGC1A pp SIRT1  
FN1 pp SKIL  
LRP1 pp SKIL  
PIAS4 pp SKIL  
SKIL pp SKIL  
SMAD2 pp SKIL  
SMAD3 pp SKIL  
SMAD4 pp SKIL  
XRCC6 pp SKIL  
CDKN1A pp SLC25A11  
SLC25A11 pp SLC25A11  
LNPEP pp SLC2A4  
UBE2I pp SLC2A4  
EGFR pp SLC3A2  
ICAM1 pp SLC3A2  
SLC7A11 pp SLC3A2  
EGFR pp SLC9A3R1  
GRK6 pp SLC9A3R1  
NF2 pp SLC9A3R1  
TBC1D10A pp SLC9A3R1  
ADORA2B pp SLC9A3R2  
TBC1D10A pp SLC9A3R2  
AKT1 pp SMAD2  
ARL4D pp SMAD2  
CDK4 pp SMAD2  
CREBBP pp SMAD2  
MAPK1 pp SMAD2  
MAPK3 pp SMAD2  
MAPK8 pp SMAD2  
OS9 pp SMAD2  
PIAS4 pp SMAD2  
SMAD2 pp SMAD2  
SMAD3 pp SMAD2  
SNW1 pp SMAD2  
TGFB1 pp SMAD2  
TP53 pp SMAD2  
AKT1 pp SMAD3

ATF3 pp SMAD3  
CDK2 pp SMAD3  
CDK4 pp SMAD3  
CREBBP pp SMAD3  
DVL1 pp SMAD3  
ESR1 pp SMAD3  
ESR2 pp SMAD3  
ETS1 pp SMAD3  
FOS pp SMAD3  
JUND pp SMAD3  
LMNA pp SMAD3  
MAP3K7 pp SMAD3  
MAPK1 pp SMAD3  
MAPK14 pp SMAD3  
MBD1 pp SMAD3  
PIAS4 pp SMAD3  
PPP2R1A pp SMAD3  
PRKAR2A pp SMAD3  
SMAD3 pp SMAD3  
SP1 pp SMAD3  
TP53 pp SMAD3  
TP73 pp SMAD3  
XRCC6 pp SMAD3  
AKT1 pp SMAD4  
ATF7IP pp SMAD4  
COPS5 pp SMAD4  
CREBBP pp SMAD4  
DVL1 pp SMAD4  
ESR1 pp SMAD4  
EWSR1 pp SMAD4  
FN1 pp SMAD4  
MAPK1 pp SMAD4  
PAPPA2 pp SMAD4  
PIAS4 pp SMAD4  
PRKAR2A pp SMAD4  
SMAD2 pp SMAD4  
SMAD3 pp SMAD4  
SMAD4 pp SMAD4  
SP1 pp SMAD4  
UBE2I pp SMAD4  
AKT1 pp SMAD7  
BMPR1B pp SMAD7  
CTNNB1 pp SMAD7  
DVL1 pp SMAD7

MBD1 pp SMAD7  
PIAS4 pp SMAD7  
SMAD7 pp SMAD7  
SMURF1pp SMAD7  
XRCC6 pp SMAD7  
ACTB pp SMAD9  
AFF1 pp SMAD9  
EIF3E pp SMAD9  
FN1 pp SMAD9  
KIAA0226 pp SMAD9  
MBD1 pp SMAD9  
PPP2R5Epp SMAD9  
PSAP pp SMAD9  
SMAD2 pp SMAD9  
SMAD3 pp SMAD9  
SMAD4 pp SMAD9  
TERF1 pp SMAD9  
UBQLN1pp SMAD9  
UBQLN4pp SMAD9  
YWHAQpp SMAD9  
TNIP2 pp SMARCD1  
TP53 pp SMARCD1  
ARL4D pp SMURF1  
CDK14 pp SMURF1  
CSNK2A2 pp SMURF1  
SFRS4 pp SMURF1  
SFRS5 pp SMURF1  
SMAD3 pp SMURF1  
CSNK1Dpp SNAPIN  
KAT5 pp SNAPIN  
LAMC1 pp SNAPIN  
MET pp SNAPIN  
PRKACA pp SNAPIN  
SHBG pp SNAPIN  
SMAD2 pp SNAPIN  
ADRBK1 pp SNCA  
BAD pp SNCA  
BCL2L1 pp SNCA  
CSNK1Dpp SNCA  
CSNK2A1 pp SNCA  
CSNK2A2 pp SNCA  
ELK1 pp SNCA  
GRK5 pp SNCA  
GRK6 pp SNCA

LYNpp SNCA  
MAPK1 pp SNCA  
PRKCE pp SNCA  
YWHAB pp SNCA  
YWHAE pp SNCA  
YWHAH pp SNCA  
ENO2 pp SNUPN  
HDAC2 pp SNW1  
NR0B1 pp SNW1  
PGRpp SNW1  
SMAD3 pp SNW1  
BCL2 pp SOD1  
SOD1 pp SOD1  
SOSTDC1 pp SOSTDC1  
SOX10 pp SOX10  
ATF7IP pp SP1  
CASP3 pp SP1  
CSNK2A1 pp SP1  
ESR1 pp SP1  
ESR2 pp SP1  
ETS1 pp SP1  
HCFC1 pp SP1  
HDAC1 pp SP1  
HDAC2 pp SP1  
HIF1A pp SP1  
HNF4A pp SP1  
MAPK1 pp SP1  
MAPK3 pp SP1  
MYC pp SP1  
PER3 pp SP1  
PSMC5 pp SP1  
SMAD2 pp SP1  
SOX10 pp SP1  
SOX8 pp SP1  
SP1 pp SP1  
SREBF2 pp SP1  
TP53 pp SP1  
YY1pp SP1  
SPAG4 pp SPAG4  
SPARC pp SPARC  
TGFB1 pp SPARC  
TGM2 pp SPARC  
THBS1 pp SPARC  
VEGFA pp SPARC



CTRC pp SPINK1  
NRSN1 pp SPINK1  
PRSS7 pp SPINK1  
CSNK2A1 pp SPP1  
CSNK2A2 pp SPP1  
F2 pp SPP1  
ITGAV pp SPP1  
MMP3 pp SPP1  
MMP7 pp SPP1  
PRKCA pp SPP1  
ATXN1 pp SREBF1  
ESR1 pp SREBF1  
ID3 pp SREBF1  
MAPK1 pp SREBF1  
MAPK3 pp SREBF1  
NR0B1 pp SREBF1  
SMARCD3 pp SREBF1  
SP1 pp SREBF1  
SREBF1 pp SREBF1  
SUMO1 pp SREBF1  
TWIST2 pp SREBF1  
UBE2I pp SREBF1  
YY1pp SREBF1  
CASP3 pp SREBF2  
INSIG2 pp SREBF2  
KPNB1 pp SREBF2  
MAPK3 pp SREBF2  
SCAP pp SREBF2  
SMAD3 pp SREBF2  
SREBF2 pp SREBF2  
SUMO1 pp SREBF2  
UBE2I pp SREBF2  
CASP3 pp SRF  
CREBBPpp SRF  
CSNK2A1 pp SRF  
GATA4 pp SRF  
NCOA1 pp SRF  
NCOR2 pp SRF  
PRKDC pp SRF  
RPS6KA1 pp SRF  
SRF pp SRF  
ENO2 pp ST3GAL2  
AKT1 pp STAT1  
EGFR pp STAT1

FGFR3 pp STAT1  
FOS pp STAT1  
KIT pp STAT1  
LCK pp STAT1  
PDGFRA pp STAT1  
PRKCD pp STAT1  
PRMT1 pp STAT1  
PTK2 pp STAT1  
PTPN11 pp STAT1  
RAC1 pp STAT1  
RELA pp STAT1  
STAT1 pp STAT1  
SUMO4 pp STAT1  
UBE2I pp STAT1  
AR pp STAT3  
CCND1 pp STAT3  
CDKN1A pp STAT3  
CREBBP pp STAT3  
EGFR pp STAT3  
EPHA3 pp STAT3  
FGFR3 pp STAT3  
GNB2L1 pp STAT3  
HDAC1 pp STAT3  
HDAC2 pp STAT3  
HNF1A pp STAT3  
HSP90AA1 pp STAT3  
IL2RB pp STAT3  
JUN pp STAT3  
KAT5 pp STAT3  
LCK pp STAT3  
MAP3K7 pp STAT3  
MAPK1 pp STAT3  
MAPK3 pp STAT3  
MAPK8 pp STAT3  
MET pp STAT3  
NCOA1 pp STAT3  
NFKB1 pp STAT3  
NR3C1 pp STAT3  
PDIA3 pp STAT3  
PRKCD pp STAT3  
PTPN11 pp STAT3  
RAC1 pp STAT3  
RELA pp STAT3  
STAT1 pp STAT3

STAT3 pp STAT3  
SUMO4 pp STAT3  
CREBBP pp STAT4  
MAP2K6pp STAT4  
MAPK14pp STAT4  
STAT3 pp STAT4  
STAT4 pp STAT4  
ADAM11 pp STC2  
ARRB2 pp STC2  
PEBP1 pp STC2  
PPP1R8 pp STC2  
PTNpp STC2  
BMPR1Bpp STK35  
SMAD4 pp STK35  
SMURF1pp STK35  
STK35 pp STK35  
HTTpp SUMO1  
SOX10 pp SUMO1  
TP73 pp SUMO1  
UBE2I pp SUMO1  
PIAS4 pp SUMO2  
SOX10 pp SUMO2  
SUMO2 pp SUMO2  
TRIM63 pp SUMO2  
UBE2I pp SUMO2  
VIMpp SUMO2  
HSF1 pp SUMO3  
PIAS4 pp SUMO3  
SOX10 pp SUMO3  
UBE2I pp SUMO3  
VIMpp SUMO3  
FNBP4 pp SYNJ1  
TAF1 pp TAF1  
TBPpp TAF1  
PRKCD pp TAGLN  
NDRG1 pp TARS  
RIPK1 pp TAX1BP1  
RNF11 pp TAX1BP1  
TAX1BP1 pp TAX1BP1  
TBC1D10A pp TBC1D10A  
DR1pp TBP  
HNRNPK pp TBP  
MYC pp TBP  
NCOA1 pp TBP

RB1 pp TBP  
SP1 pp TBP  
TBP pp TBP  
YWHAE pp TBP  
TBX3 pp TBX3  
ANGPT1 pp TEK  
PTPN11 pp TEK  
TEK pp TEK  
TNIP2 pp TEK  
KPNB1 pp TERF1  
POT1 pp TERF1  
TERF1 pp TERF1  
TNKS pp TERF1  
CDKN1A pp TEX11  
UBE2I pp TFAP2B  
DPT pp TGFB1  
ITGAV pp TGFB1  
ITGB8 pp TGFB1  
SDC2 pp TGFB1  
TGFB1 pp TGFB1  
TGFB2 pp TGFB1  
TGFB1 pp TGFB1  
TGFB2 pp TGFB1  
TGFB3 pp TGFB1  
YWHAE pp TGFB1  
TGFB2 pp TGFB2  
TGFB3 pp TGFB2  
TGFB3 pp TGFB2  
TGFB3 pp TGFB3  
ACVR1 pp TGFB1  
ARL4D pp TGFB1  
BMP1B pp TGFB1  
CAV1 pp TGFB1  
CDK14 pp TGFB1  
CDK4 pp TGFB1  
CDK6 pp TGFB1  
CHUK pp TGFB1  
CSNK2A2 pp TGFB1  
IKBKB pp TGFB1  
MAP3K7 pp TGFB1  
PPP2R2A pp TGFB1  
RHOA pp TGFB1  
SMAD3 pp TGFB1  
SMAD4 pp TGFB1

SMAD7 pp TGFBR1  
STK35 pp TGFBR1  
TGFB2 pp TGFBR1  
TGFB3 pp TGFBR1  
TGFBR1 pp TGFBR1  
TGFBR2 pp TGFBR1  
XIAP pp TGFBR1  
CCNB2 pp TGFBR2  
CDK1 pp TGFBR2  
CTNNB1 pp TGFBR2  
PIK3R1 pp TGFBR2  
SMAD3 pp TGFBR2  
SMAD4 pp TGFBR2  
SMAD7 pp TGFBR2  
TGFB2 pp TGFBR2  
TGFB3 pp TGFBR2  
TGFBR2 pp TGFBR2  
TGFBR3 pp TGFBR2  
GIPC1 pp TGFBR3  
SDC2 pp TGFBR3  
CASP3 pp TGM2  
EIF5A pp TGM2  
HIST1H2BG pp TGM2  
HIST2H2BE pp TGM2  
KPNA3 pp TGM2  
KPNA4 pp TGM2  
MAP3K12 pp TGM2  
PLCD1 pp TGM2  
PPHLN1 pp TGM2  
SMAD2 pp TGM2  
SMAD3 pp TGM2  
TGM2 pp TGM2  
TMSB4X pp TGM2  
TUBB pp TGM2  
QKI pp THAP1  
THAP1 pp THAP1  
CD47 pp THBS1  
JAG1 pp THBS1  
TGFB1 pp THBS1  
ESR1 pp THRA  
NCOA1 pp THRA  
ACVR1 pp THRB  
CNOT1 pp THRB  
ESR1 pp THRB

NCOA1 pp THR  
THR pp THR  
THY1 pp THY1  
RIPK1 pp TICAM1  
TNFAIP3pp TICAM1  
TRAF3 pp TICAM1  
CDK1 pp TK1  
GAPDH pp TK1  
PRDM1 pp TLE1  
TK1 pp TLE1  
TLE1 pp TLE1  
TLE2 pp TLE1  
PRDM1 pp TLE2  
NDRG1 pp TLE3  
BNIP3 pp TMEM11  
BNIP3L pp TMEM11  
SEMA3Fpp TMEM22  
ILK pp TMSB4X  
CNTN1 pp TNC  
ADAM9 pp TNF  
TNFpp TNF  
TRAF2 pp TNF  
CCDC50 pp TNFAIP3  
CHUK pp TNFAIP3  
IKBKB pp TNFAIP3  
IKBKG pp TNFAIP3  
LAPTM5pp TNFAIP3  
RNF11 pp TNFAIP3  
TAX1BP1 pp TNFAIP3  
TNFAIP3pp TNFAIP3  
TNIP1 pp TNFAIP3  
TNIP2 pp TNFAIP3  
TRAF1 pp TNFAIP3  
TRAF2 pp TNFAIP3  
TRAF6 pp TNFAIP3  
YWHAB pp TNFAIP3  
YWHAE pp TNFAIP3  
YWHAG pp TNFAIP3  
YWHAZ pp TNFAIP3  
FURIN pp TNFSF13  
RNF11 pp TNIP1  
RELA pp TNIP2  
SFRS5 pp TNK2  
WWOX pp TNK2

FNBP1 pp TNKS  
MCL1 pp TNKS  
POT1 pp TNKS  
TNKS1BP1 pp TNKS  
TNKS2 pp TNKS  
VPS33A pp TNKS  
TNKS2 pp TNKS1BP1  
LNPEP pp TNKS2  
TERF1 pp TNKS2  
CA12 pp TOE1  
SUMO1 pp TOE1  
TOE1 pp TOE1  
ATF3 pp TP53  
BCL2L1 pp TP53  
CDC42 pp TP53  
CDK2 pp TP53  
CDK5 pp TP53  
CEBPZ pp TP53  
CHUK pp TP53  
COPS4 pp TP53  
COPS5 pp TP53  
CREBBP pp TP53  
CSNK1D pp TP53  
CSNK2A1 pp TP53  
CSNK2B pp TP53  
DDX5 pp TP53  
GSK3B pp TP53  
HABP4 pp TP53  
HIF1A pp TP53  
HNF4A pp TP53  
KAT2B pp TP53  
KPNB1 pp TP53  
MAPK1 pp TP53  
MAPK3 pp TP53  
MAPK8 pp TP53  
MED1 pp TP53  
MNAT1 pp TP53  
PIAS4 pp TP53  
PPP2CA pp TP53  
PRKCA pp TP53  
PRKDC pp TP53  
PRMT1 pp TP53  
PTGS2 pp TP53  
PTK2 pp TP53

SIN3A pp TP53  
SIRT1 pp TP53  
SUMO1 pp TP53  
TBP pp TP53  
THRB pp TP53  
TK1 pp TP53  
TP53 pp TP53  
TP73 pp TP53  
TSG101 pp TP53  
UBE2I pp TP53  
WWOX pp TP53  
YWHAG pp TP53  
YWHAZ pp TP53  
ABL1 pp TP73  
CDK1 pp TP73  
CDK2 pp TP73  
CEBPZ pp TP73  
SMAD2 pp TP73  
TP73 pp TP73  
WWOX pp TP73  
BIRC2 pp TRAF1  
BIRC3 pp TRAF1  
CASP10 pp TRAF1  
CASP3 pp TRAF1  
RIPK1 pp TRAF1  
TICAM1 pp TRAF1  
TRAIP pp TRAF1  
ATXN1 pp TRAF2  
BCL10 pp TRAF2  
CYLD pp TRAF2  
GSTP1 pp TRAF2  
IKBKB pp TRAF2  
MAP3K5 pp TRAF2  
PKN1 pp TRAF2  
RIPK1 pp TRAF2  
SIAH2 pp TRAF2  
TRAF1 pp TRAF2  
TRAF2 pp TRAF2  
TRAIP pp TRAF2  
CASP3 pp TRAF3  
RIPK1 pp TRAF3  
TRAF3 pp TRAF3  
TRAF3IP3 pp TRAF3  
ABL1 pp TRAF6



CAV1 pp TRAF6  
MAP2K1pp TRAF6  
MAP2K6pp TRAF6  
MAP3K5pp TRAF6  
MAP3K7pp TRAF6  
PSMC2 pp TRAF6  
PSMC3 pp TRAF6  
SIGIRR pp TRAF6  
TAX1BP1 pp TRAF6  
TGFBR1 pp TRAF6  
TICAM1 pp TRAF6  
TRAF2 pp TRAF6  
TRAF6 pp TRAF6  
CYLD pp TRAF7  
TRAF6 pp TRAF7  
TRAF7 pp TRAF7  
CYLD pp TRAIIP  
PRSS23 pp TRAPPC4  
GMEB1 pp TRIM63  
TRIM63 pp TRIM63  
UBE2I pp TRIM63  
CDK1 pp TSC1  
NF2 pp TSC1  
RDX pp TSC1  
YWHAG pp TSC1  
TSC22D3 pp TSC22D3  
CDKN1A pp TTLL5  
EGFR pp TUBA4A  
ENO2 pp TUBA4A  
HSPH1 pp TUBA4A  
RAC1 pp TUBA4A  
SIAH1 pp TUBA4A  
TAOK2 pp TUBA4A  
YWHAG pp TUBA4A  
BMP2 pp TUBB  
ESR1 pp TUBB  
TAOK2 pp TUBB  
YWHAB pp TUBB  
YWHAG pp TUBB  
YWHAZ pp TUBB  
CDK1 pp UBA1  
HSPH1 pp UBA1  
SEMA3F pp UBA1  
ATXN1 pp UBAP2L

IGF1R pp UBC  
PPARGC1A pp UBC  
RNF11 pp UBC  
YWHAB pp UBC  
YWHAG pp UBC  
YWHAZ pp UBC  
TGFBR1 pp UBD  
ENO2 pp UBE2C  
UBE2C pp UBE2C  
ATXN1 pp UBE2I  
ELK1 pp UBE2I  
ESR1 pp UBE2I  
GMEB1 pp UBE2I  
HABP4 pp UBE2I  
HNF4A pp UBE2I  
HNRNPK pp UBE2I  
LMNA pp UBE2I  
SKIL pp UBE2I  
SOX10 pp UBE2I  
UBE2I pp UBE2I  
KITLG pp UBE2V1  
SUMO4 pp UBE2V1  
HK2pp UBQLN1  
P4HB pp UBQLN1  
UBQLN1pp UBQLN1  
HK2pp UBQLN4  
PTNpp UBQLN4  
RNF11 pp UBQLN4  
RUNX1T1 pp UBQLN4  
RXRA pp UBQLN4  
SPP1 pp UBQLN4  
TRAF2 pp UBQLN4  
UBQLN1pp UBQLN4  
UBQLN4pp UBQLN4  
YWHAQ pp UBQLN4  
BAT5 pp UPF1  
NDRG1 pp UPF1  
PPARGC1A pp USF2  
USF2 pp USF2  
QKI pp USH1C  
USH1C pp USH1C  
YWHAG pp USP37  
CTSG pp VCAM1  
MSN pp VCAM1

VCAM1 pp VCAM1  
NDRG1 pp VCP  
SUMO4 pp VCP  
VCPpp VCP  
NRP1 pp VEGFA  
NRP2 pp VEGFA  
SEMA3Fpp VEGFA  
VEGFA pp VEGFA  
EPAS1 pp VHL  
FLNA pp VHL  
HIF1A pp VHL  
HIF3A pp VHL  
SP1 pp VHL  
CASP3 pp VIM  
CASP9 pp VIM  
CDH5 pp VIM  
CDK1 pp VIM  
DCTN1 pp VIM  
PIAS4 pp VIM  
PKN1 pp VIM  
PPHLN1 pp VIM  
ROCK1 pp VIM  
SMAD3 pp VIM  
VIMpp VIM  
YWHAE pp VIM  
YWHAZ pp VIM  
TRAF2 pp WDR65  
EGLN3 pp WDR83  
AKT1 pp WNK1  
YWHAG pp WNK1  
XBP1 pp XBP1  
AKT1 pp XIAP  
CASP3 pp XIAP  
CASP9 pp XIAP  
DIABLO pp XIAP  
MAP3K7pp XIAP  
TRAF6 pp XIAP  
XIAP pp XIAP  
AR pp XRCC5  
NDRG1 pp XRCC5  
RBM14 pp XRCC5  
SGOL1 pp XRCC5  
XRCC5 pp XRCC5  
ABL1 pp XRCC6

AR pp XRCC6  
CCNA1 pp XRCC6  
MAPK8 pp XRCC6  
PARP1 pp XRCC6  
PCNA pp XRCC6  
PRKDC pp XRCC6  
SGOL1 pp XRCC6  
TP53 pp XRCC6  
XRCC5 pp XRCC6  
ABL1 pp YWHAB  
BAD pp YWHAB  
CDK14 pp YWHAB  
IKBKB pp YWHAB  
PRKCD pp YWHAB  
PRKCZ pp YWHAB  
RPS6KA1 pp YWHAB  
TSC1 pp YWHAB  
YWHAB pp YWHAB  
YWHAG pp YWHAB  
ABL1 pp YWHAE  
CASP3 pp YWHAE  
CDK14 pp YWHAE  
HSF1 pp YWHAE  
MAP3K2 pp YWHAE  
NCOR2 pp YWHAE  
PRKCG pp YWHAE  
TSC1 pp YWHAE  
YWHAB pp YWHAE  
YWHAZ pp YWHAE  
ABL1 pp YWHAG  
BAD pp YWHAG  
CRTC2 pp YWHAG  
EEF1G pp YWHAG  
KIF5B pp YWHAG  
MAP3K2 pp YWHAG  
PAK4 pp YWHAG  
YWHAE pp YWHAG  
YWHAG pp YWHAG  
ABL1 pp YWHAH  
BAD pp YWHAH  
CREBBP pp YWHAH  
ESR1 pp YWHAH  
ESR2 pp YWHAH  
KCNH2 pp YWHAH

MAP3K5pp YWHAH  
MED1 pp YWHAH  
NCOA1 pp YWHAH  
NR3C1 pp YWHAH  
RAF1 pp YWHAH  
THRA pp YWHAH  
TNFAIP3pp YWHAH  
TSC1 pp YWHAH  
YWHAE pp YWHAH  
YWHAGpp YWHAH  
ABL1 pp YWHAQ  
BAD pp YWHAQ  
CABIN1 pp YWHAQ  
CDK14 pp YWHAQ  
CSNK2A1 pp YWHAQ  
KIF5B pp YWHAQ  
MAP3K5pp YWHAQ  
MTNR1B pp YWHAQ  
PDK1 pp YWHAQ  
PRKD1 pp YWHAQ  
TSC1 pp YWHAQ  
YWHAGpp YWHAQ  
YWHAQpp YWHAQ  
ABL1 pp YWHAZ  
AKT1 pp YWHAZ  
ATXN1 pp YWHAZ  
BAD pp YWHAZ  
CRTC2 pp YWHAZ  
LIMK1 pp YWHAZ  
MAP3K2pp YWHAZ  
MAP3K5pp YWHAZ  
MAPK8 pp YWHAZ  
PRKCD pp YWHAZ  
TSC1 pp YWHAZ  
XRCC6 pp YWHAZ  
YWHAZ pp YWHAZ  
HDAC2 pp YY1  
CREBBPpp ZBTB17  
ESR1 pp ZBTB17  
ESR2 pp ZBTB17  
HK2pp ZBTB17  
PGRpp ZBTB17  
RIPK1 pp ZFAND5  
TNFAIP3pp ZFAND5

TRAF6 pp ZFAND5  
ZFAND5 pp ZFAND5  
NDRG1 pp ZNF155  
COIL pp ZNF277

**Supplementary Material IV.** A new DEG PPI network derived from STRING dataset.

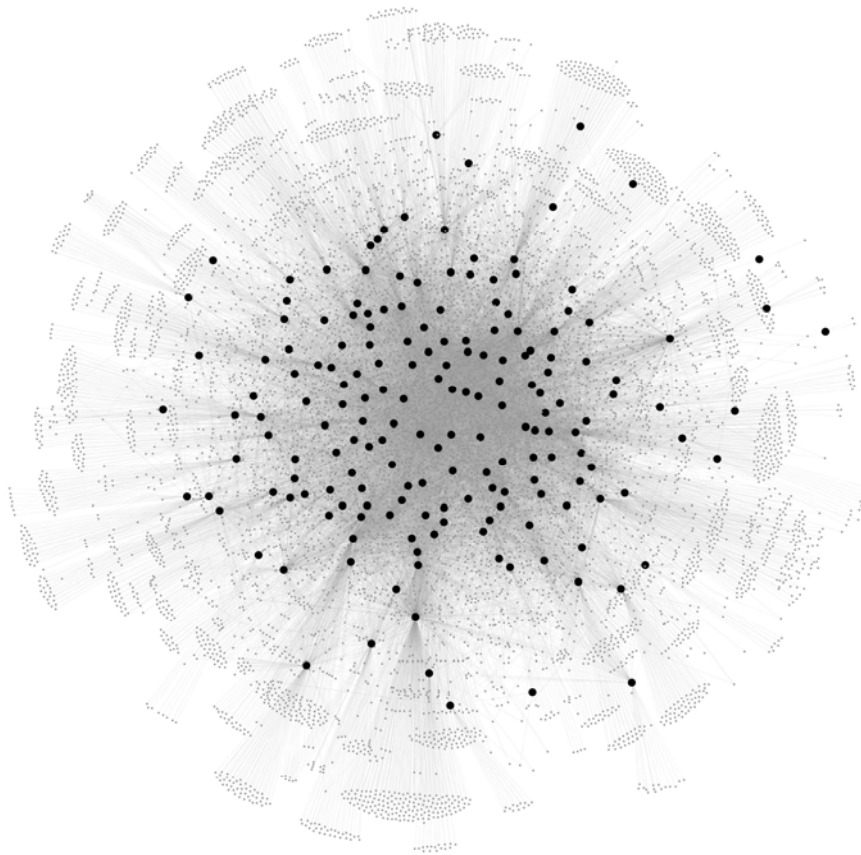

**Supplementary Material IV.** A new DEG PPI network derived from STRING dataset, which contain 8362 nodes (179 DEGs) and 23117 edges. The black nodes present the DEGs, the white small nodes present their interacting proteins.

**Supplementary Material V.** The distributions of node degree of new DEG network derived from STRING dataset.

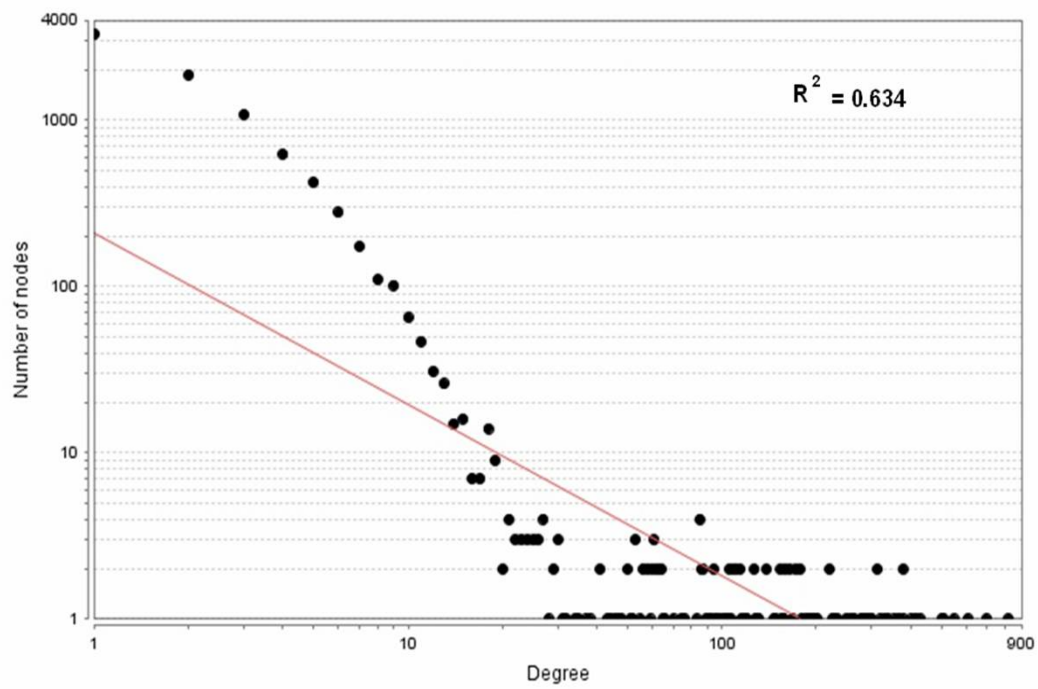

Supplementary Material V. Power law distribution of node degree.



**Supplementary Material IV.** Topological parameters of the total DEG PPI sub-network derived from STRING

| PPI sub-network | $y = \beta x^a$        | $R^2$ | correlation | clustering coefficient | network centralization | network density |
|-----------------|------------------------|-------|-------------|------------------------|------------------------|-----------------|
| Total DEGs      | $y = 209.57x^{-1.033}$ | 0.634 | 0.978       | 0.106                  | 0.097                  | 0.001           |
